# Supplementary material for: Mice depleted for Exchange Proteins Directly Activated by cAMP (Epac) exhibit irregular liver regeneration in response to partial hepatectomy
Source: Sci Rep. 2019 Sep 24;9:13789. doi: 10.1038/s41598-019-50219-8 (PMC6760117; doi:10.1038/s41598-019-50219-8)
Supplement: Supplementary file 1 — Supplementary Information [file 41598_2019_50219_MOESM1_ESM.pdf]

**Supplementary information**

Title: Mice depleted for Exchange Proteins Directly Activated by cAMP (Epac) exhibit irregular liver regeneration in response to partial hepatectomy.

List of authors: Kathrine Sivertsen Åsrud<sup>\*1</sup>, Line Pedersen<sup>1</sup>, Reidun Aesoy<sup>2</sup>, Haruna Muwonge<sup>1</sup>, Elise Aasebø<sup>2,3</sup>, Ina Katrine Nitschke Pettersen<sup>1</sup>, Lars Herfindal<sup>2</sup>, Ross Dobie<sup>4</sup>, Stephen Jenkins<sup>4</sup>, Rolf Kristian Berge<sup>2,5</sup>, Neil Cowan Henderson<sup>4</sup>, Frode Selheim<sup>1,2</sup>, Stein Ove Døskeland<sup>1</sup> and Marit Bakke<sup>1</sup>

**Affiliations:**

<sup>1</sup>Department of Biomedicine, The University of Bergen, Bergen, Norway

<sup>2</sup>Department of Clinical Science, The University of Bergen, Bergen, Norway

<sup>3</sup>Department of Biomedicine, The Proteomic Unit at The University of Bergen (PROBE), University of Bergen, 5009 Bergen, Norway

<sup>4</sup>Centre for Inflammation Research, The University of Edinburgh, UK

<sup>5</sup>Department of Heart Disease, Haukeland University Hospital, Bergen, Norway

**Corresponding author:**

Kathrine Sivertsen Åsrud, Department of Biomedicine, University of Bergen, Jonas Lies vei 91, N-5009, Bergen, Norway

E-mail: Kathrine.Asrud@uib.no

Phone: +4755586381

## Materials & Methods

### *Reagents*

Alexa Fluor® 488 Donkey Anti-Rat IgG (H+L) (cat.# A-21208), Alexa Fluor® 594 Goat Anti-Rabbit IgG (H+L) (cat.# A-11037) and Prolong® Gold Antifade Reagent with DAPI (cat.# P36935) were obtained from Life Technologies (Carlsbad, CA, USA). APC anti-mouse CD31 (cat.# 102509, clone.# MEC13.3), APC anti-mouse CD31 (cat.# 102409, clone.# 390), APC/Cy7 anti-mouse/human CD11b (cat.# 101225, clone.# M1/70), FITC anti-mouse CD45.2 (cat.# 109805), PE anti-mouse CD3 (cat.# 100205, clone.# 17A2), PE anti-mouse CD19 (cat.# 115507, clone.# 6D5), PE anti-mouse Ly-6G (cat.# 127605, clone.# 1A8), PE/Cy7 anti-mouse CD45 (cat.# 103113, clone.# 30-F11), PE/Cy7 anti-mouse F4/80 (cat.# 123113, clone.# BM8) and Purified anti-mouse CD16/32 8 (cat.# 101302, clone.# 93) were from BioLegend (San Diego, CA, USA). Goat IgG Isotype Control (cat.# 02-6202, clone.# 104) and Normal Goat Serum (cat.# PCN5000) were from Invitrogen (Waltham, MA, USA). Mdr Antibody (ABCB1) (cat.# SC-8313, clone.# H-241) was from Santa Cruz Biotechnology (Dallas, Texas, USA). PE Rat Anti-Mouse Siglec-F (cat.# 562068, clone.# E50-2440) was from BD Biosciences (Franklin Lakes, NJ, USA). Rat ANTI-BrdU (cat.# MCA2060, clone.# BU1/75 (ICR1)) was from AbD SerpTec (Kidlington, UK). Rat IgG2a Isotype Control (cat.# CTL-4110-100) was from Nordic BioSite AB (Täby, Sweden). GeneRuler 100 bp DNA ladder (cat.# SM0241), Goat anti-Rabbit IgG (H+L) Highly Cross

Fig.4a, the white balance in the representative images for Epac1<sup>-/-</sup> and Epac2<sup>-/-</sup> 26h post-PH has been adjusted after the image was obtained.

#### *Hepatocyte size quantification*

Hepatocyte size was quantified with TRITC-conjugated Rhodamine Phalloidin (ThermoFisher) labeling of F-actin on cryosections (4μm) according to manufacturer's protocol, but with the following modification: Sections were incubated with Rhodamine Phalloidin (1:40 in PBS with 1 % BSA) for 2h at RT. The size of approximately 2000 hepatocytes per mouse was monitored using a Zeiss Axioplan2 microscope and AxioVision version 4.5 program, 20x. The Gen5 3.0 software (BioTek) was used to calculate the area per cell. Object size was set to 50-150 μm in average diameter in order to avoid any contamination by other cell types.

#### *Lipid profiling*

Lipid profiling was performed on plasma (250 μl) and liver tissue (150 mg) from control animals or from mice subjected to PH using enzymatic calorimetry based on the Trinder reaction on a Hitachi 917 automated instrument (Roche) using commercially available kits: Cholesterol, HDL-Cholesterol, LDL-Cholesterol, triglycerides and glucose (Roche), NEFA FS, free cholesterol FS and phospholipids FS (Diasys). Liver lipids were extracted according to Bligh and Dyer<sup>3</sup>.

#### *Immunohistochemistry (IHC)*

Paraffin sections were deparaffinized in xylene, rehydrated using graded alcohol series (xylene for 2x5 min, 100 % EtOH for 2x3 min, 96 % EtOH for 2x3 min), and washed in distilled water. Antigen retrieval was performed in Tris-EDTA buffer (10 mM Tris Base, 1 mM EDTA solution, 0.05 % Tween, pH= 9.0) at 98° C for 20 min followed by cooling in running tap water for 10 min. The sections were then incubated in TBS-T for 30 min at RT followed by blocking buffer [10% normal goat serum in 1 % BSA/TBS) for 2h at RT. Next, the sections were incubated with primary antibody Anti-ABCB1 (1:50 in 1 % BSA/TBS) o/n at 4° C on an orbital shaker. Parallel sections were used as negative controls and incubated in goat IgG Isotype

primary antibody (anti-CYP4A, 1:100 in 1% BSA/PBS) o/n. Following 3x5 min wash in PBS, the sections were blocked in 0.3 % H<sub>2</sub>O<sub>2</sub>/PBS in 15 min, RT. Next, sections were rinsed for 3x5 min in PBS and incubated with secondary antibody (Goat anti-rabbit, HRP 1:500 1% BSA/PBS) in 2h at RT, followed by colorimetric detection with a Dako Liquid DAB+ Substrate Chromogen System for 15 min. Finally, the sections were rinsed in PBS (5 min) and ddH<sub>2</sub>O (5 min) before counterstained with hematoxylin (1 min), rinsed 3x5 min in ddH<sub>2</sub>O and mounted with Aqua Pertex.

#### *Immunoblotting*

To determine the expression levels of CYP4A (10, 12 and 14), Cyclin D1, Cyclin E1, IL-1, TNF $\alpha$  and PPAR $\alpha$  in the liver, 40  $\mu$ g of whole liver extracts in RIPA buffer containing cOMplete™ Mini Protease Inhibitor Cocktail was separated by 12 % (w/vol) SDS/PAGE and transferred to Hybond™ P 0.45 $\mu$ m PVDF membrane (GE-Healthcare) using either anti-CYP4A (1:1000 in PBS-T o/n), anti-Cyclin D1 (1:10 000 in TBS-T o/n), anti- Cyclin E1 (1:2000 in TBS-T o/n), Anti-IL1 (1:1000 in 5% BSA), Anti-TNF $\alpha$  (1:500 in 1% BSA/TBS-T(0.1% o/n) or anti-PPAR $\alpha$  (1:125 in PBS-T o/n) as primary antibodies, and HRP-conjugated anti-Rabbit IgG (H+L) (1:10 000 in PBS-T, 2h at RT) as secondary antibody. Blots were developed with ECL using SuperSignal® West Pico Chemiluminescent Substrate and evaluated with the Luminescent Image Analyzer LAS-3000 (Fujifilm). Relative intensity of the bands was quantified and normalized to a loading control ( $\beta$ -actin, 1:10 000 o/n) using ImageJ64 as described in <http://lukemiller.org/index.php/2010/11/analyzing-gels-and-western-blots-with-image-j/>.

target of 3e6 with a maximum injection time (IT) of 100 ms. The 15 most intense peptides with an intensity threshold of 5e4, charge states 2 or more, were isolated to a target AGC value of 1e5, resolution R=30,000, IT of 45 ms and 28 % normalized collision energy. The isolation window was 1.6 m/z with an isolation offset of 0.3 m/z and a dynamic exclusion of 30 seconds.

#### *Label-free protein quantification and data analysis*

The raw MS files were searched against the reviewed SwissProt *Mus musculus* database (downloaded 06.01.2016, containing 24 797 canonical and isoform sequences) using the MaxQuant module (version 1.5.1.2) with the integrated Andromeda search engine <sup>7</sup>. MaxQuant's settings for identification and label-free protein quantification were as described previously<sup>8</sup>. Briefly, carbamidomethylation of cysteine was set as fixed modification and acetylation of protein N-terminal and oxidation of methionine were set as variable modifications. The label-free quantification (LFQ) algorithm <sup>9</sup> was used for quantification with LFQ min. ratio count set to 1, and the match-between-runs option was enabled.

The protein output from the MaxQuant analysis was processed, filtered and log<sub>2</sub>-transformed using the Perseus (version 1.5.1.6) platform <sup>10</sup>. Reverse hits and proteins only identified by site were removed from the dataset. The samples were grouped into the following four groups 1) WTprePH 2) WTpostPH 3) Epac1/2<sup>-/-</sup>prePH 4) Epac1/2<sup>-/-</sup>postPH, and at least three valid values were required for statistical evaluation of significant differences between two groups.

#### *Statistical analysis*

The statistical significance was calculated in excel, using a two-tailed paired *t*-test for statistical evaluation of the same mice (wt or Epac1/2<sup>-/-</sup>) before and after regeneration. A two-tailed student's two-sample *t*-test (assuming unequal variance) was applied for statistical analysis between wt and Epac1/2<sup>-/-</sup> mice (before or after regeneration). A *p*-value < 0.05 was considered as significantly different. The fold changes (FC) between the different groups were found by subtracting the log<sub>2</sub> median of one group from the other. To capture the most biologically interesting differences, we applied Z-statistics to evaluate the significance of the FC-values according to

## Supplementary Figures

**Fig.S1**

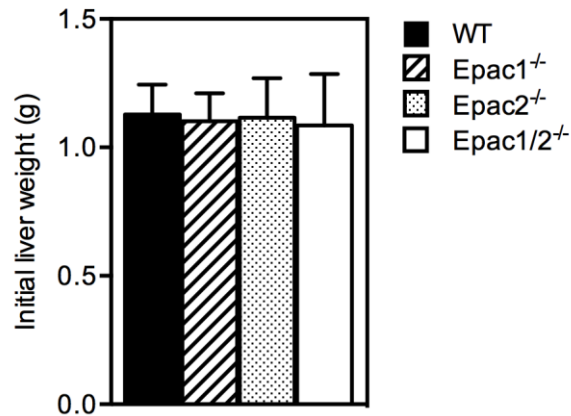

**Fig. S1. No differences in initial liver weight between genotypes.** Wt, Epac1<sup>-/-</sup>, Epac2<sup>-/-</sup> and Epac1/2<sup>-/-</sup> male mice (8-12 weeks old) were subjected to 2/3 PH. The initial total liver weight was calculated as follows: (resected liver weight (g)/ 68 (%) x 100 (%)), n= 26-37 mice/group. Data is presented as mean  $\pm$  SD. One-way ANOVA with Bonferroni's adjustment for multiple comparisons was used to determine potential significant differences between genotypes, not significant (ns); F-statistics: F(3, 122)= 0.5402, p=0.6557.

## Supplementary Figures

**Fig. S2**

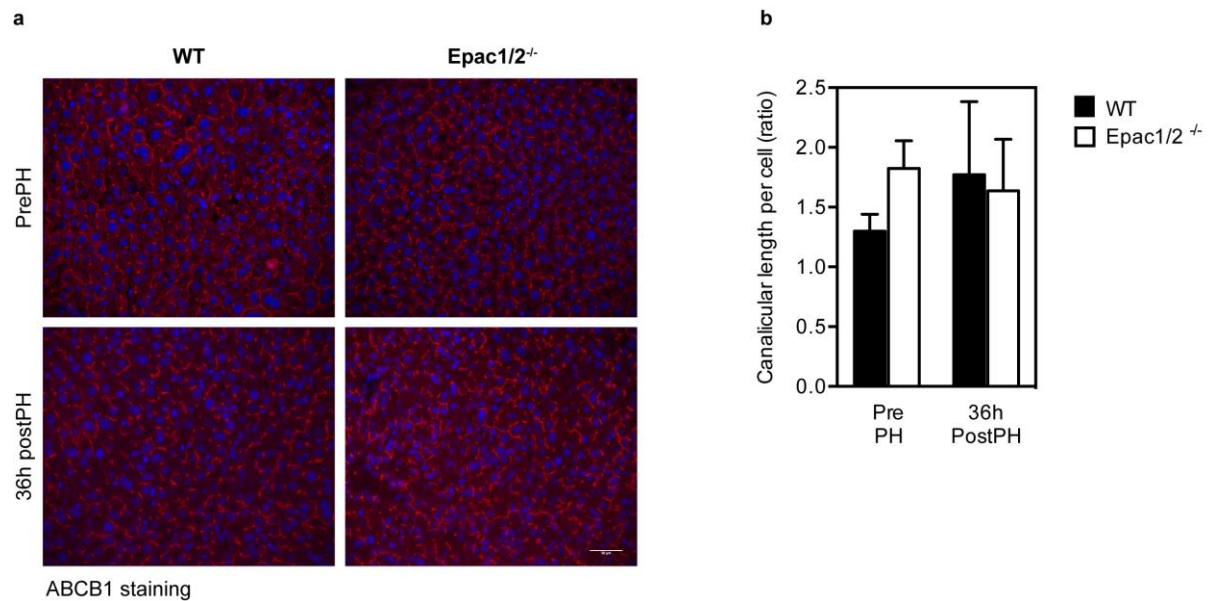

**Fig. S2. No alteration in ABCB1 distribution in *Epac1/2<sup>-/-</sup>* mice.** **a)** Shown are representative images of IHC-staining of ABCB1 (red) and DAPI (blue), in whole liver tissue harvested from wt mice and *Epac1/2<sup>-/-</sup>* mice pre- and 36h post-PH, 20x. **b)** Quantification of canalicular length per cell in wt (black bars) and *Epac1/2<sup>-/-</sup>* (white bars) mice pre- and 36h post-PH. For each mouse, the canalicular length per cell was measured in three 20x microscopic fields (141.9 mm<sup>2</sup>) in three different sections. Please see the IHC-section in supplementary M&M for further details. Values represent mean  $\pm$  SD, n=3-4 mice/group. Two-way ANOVA was used to determine differences

## Supplementary Figures

**Fig.S3**

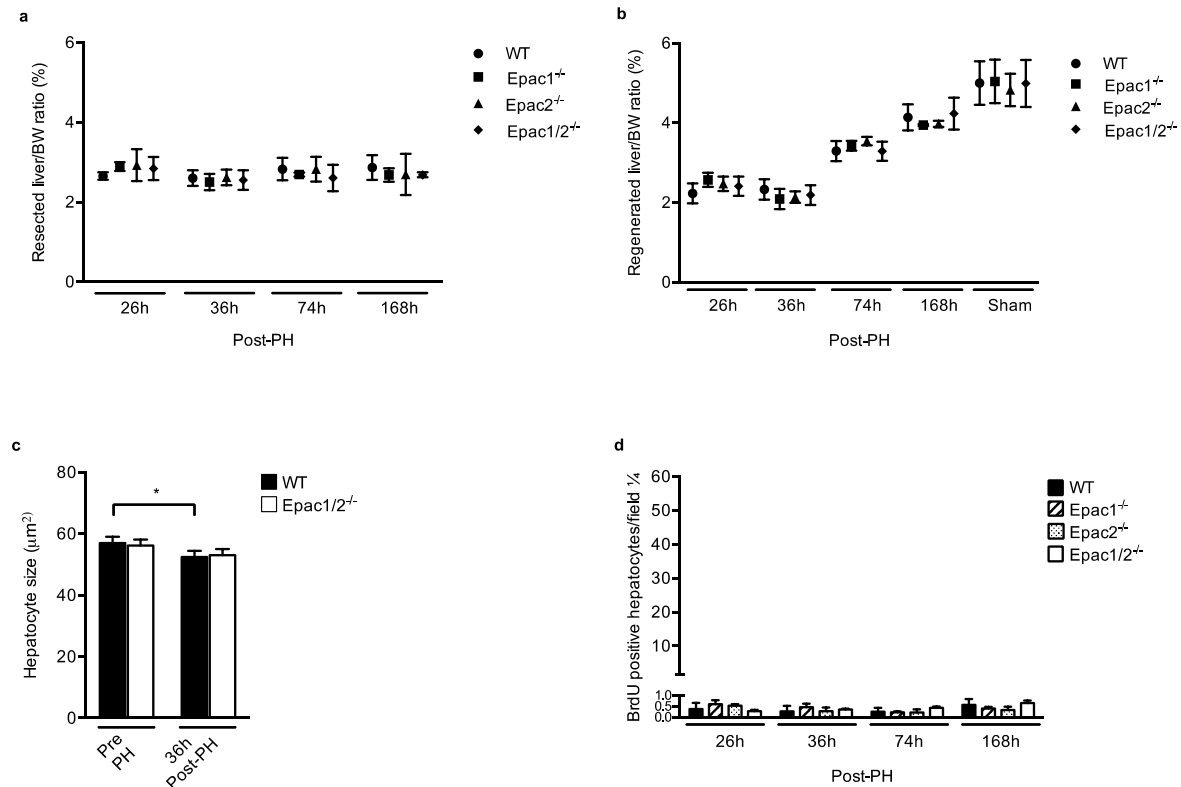

# Supplementary Figures

## Fig.S4

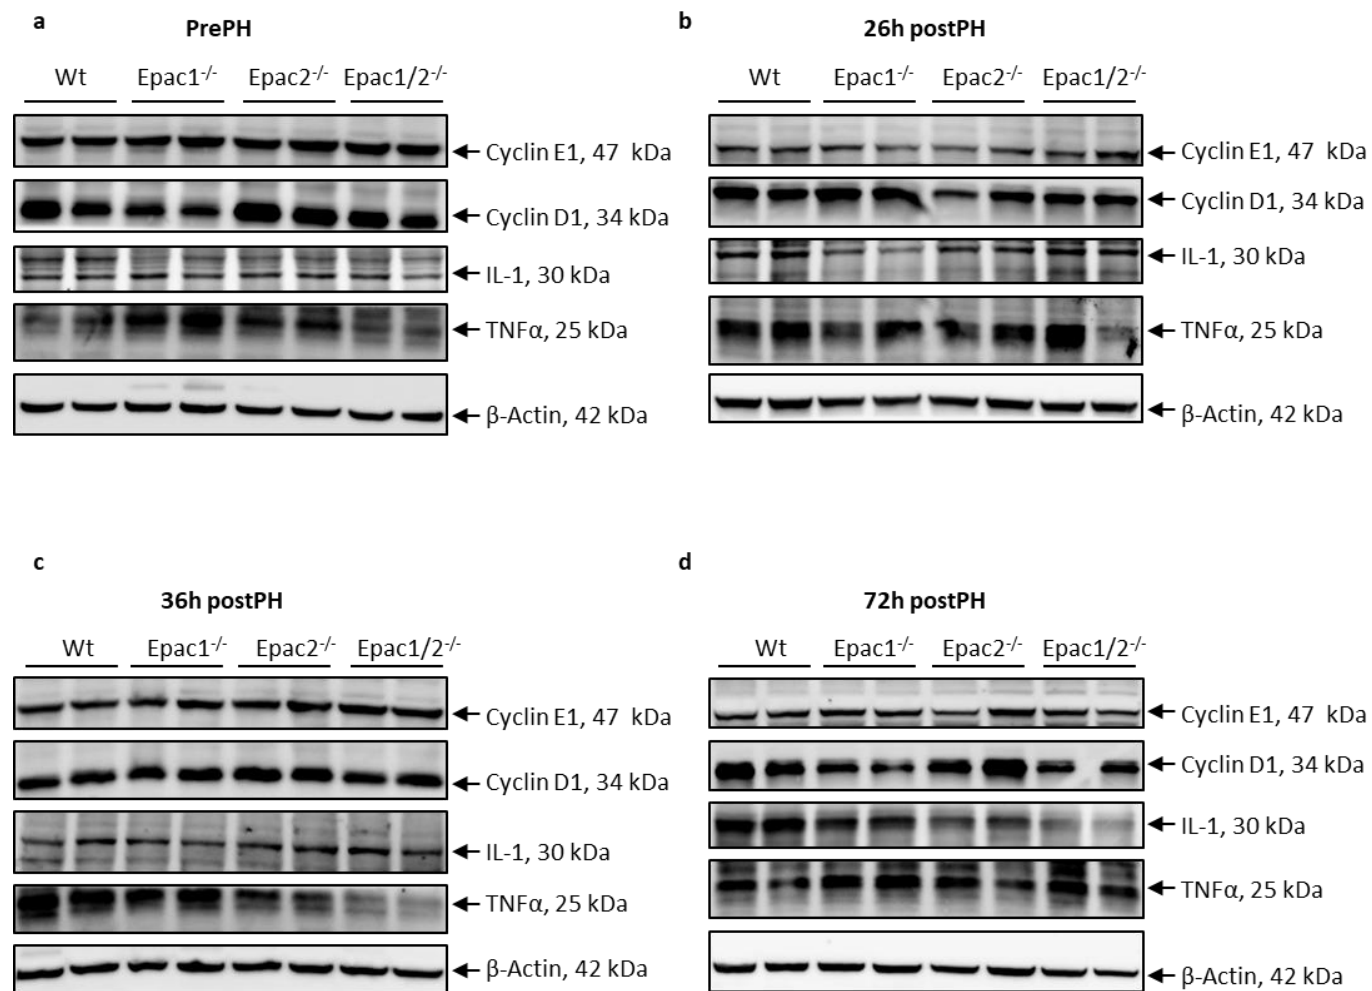

276

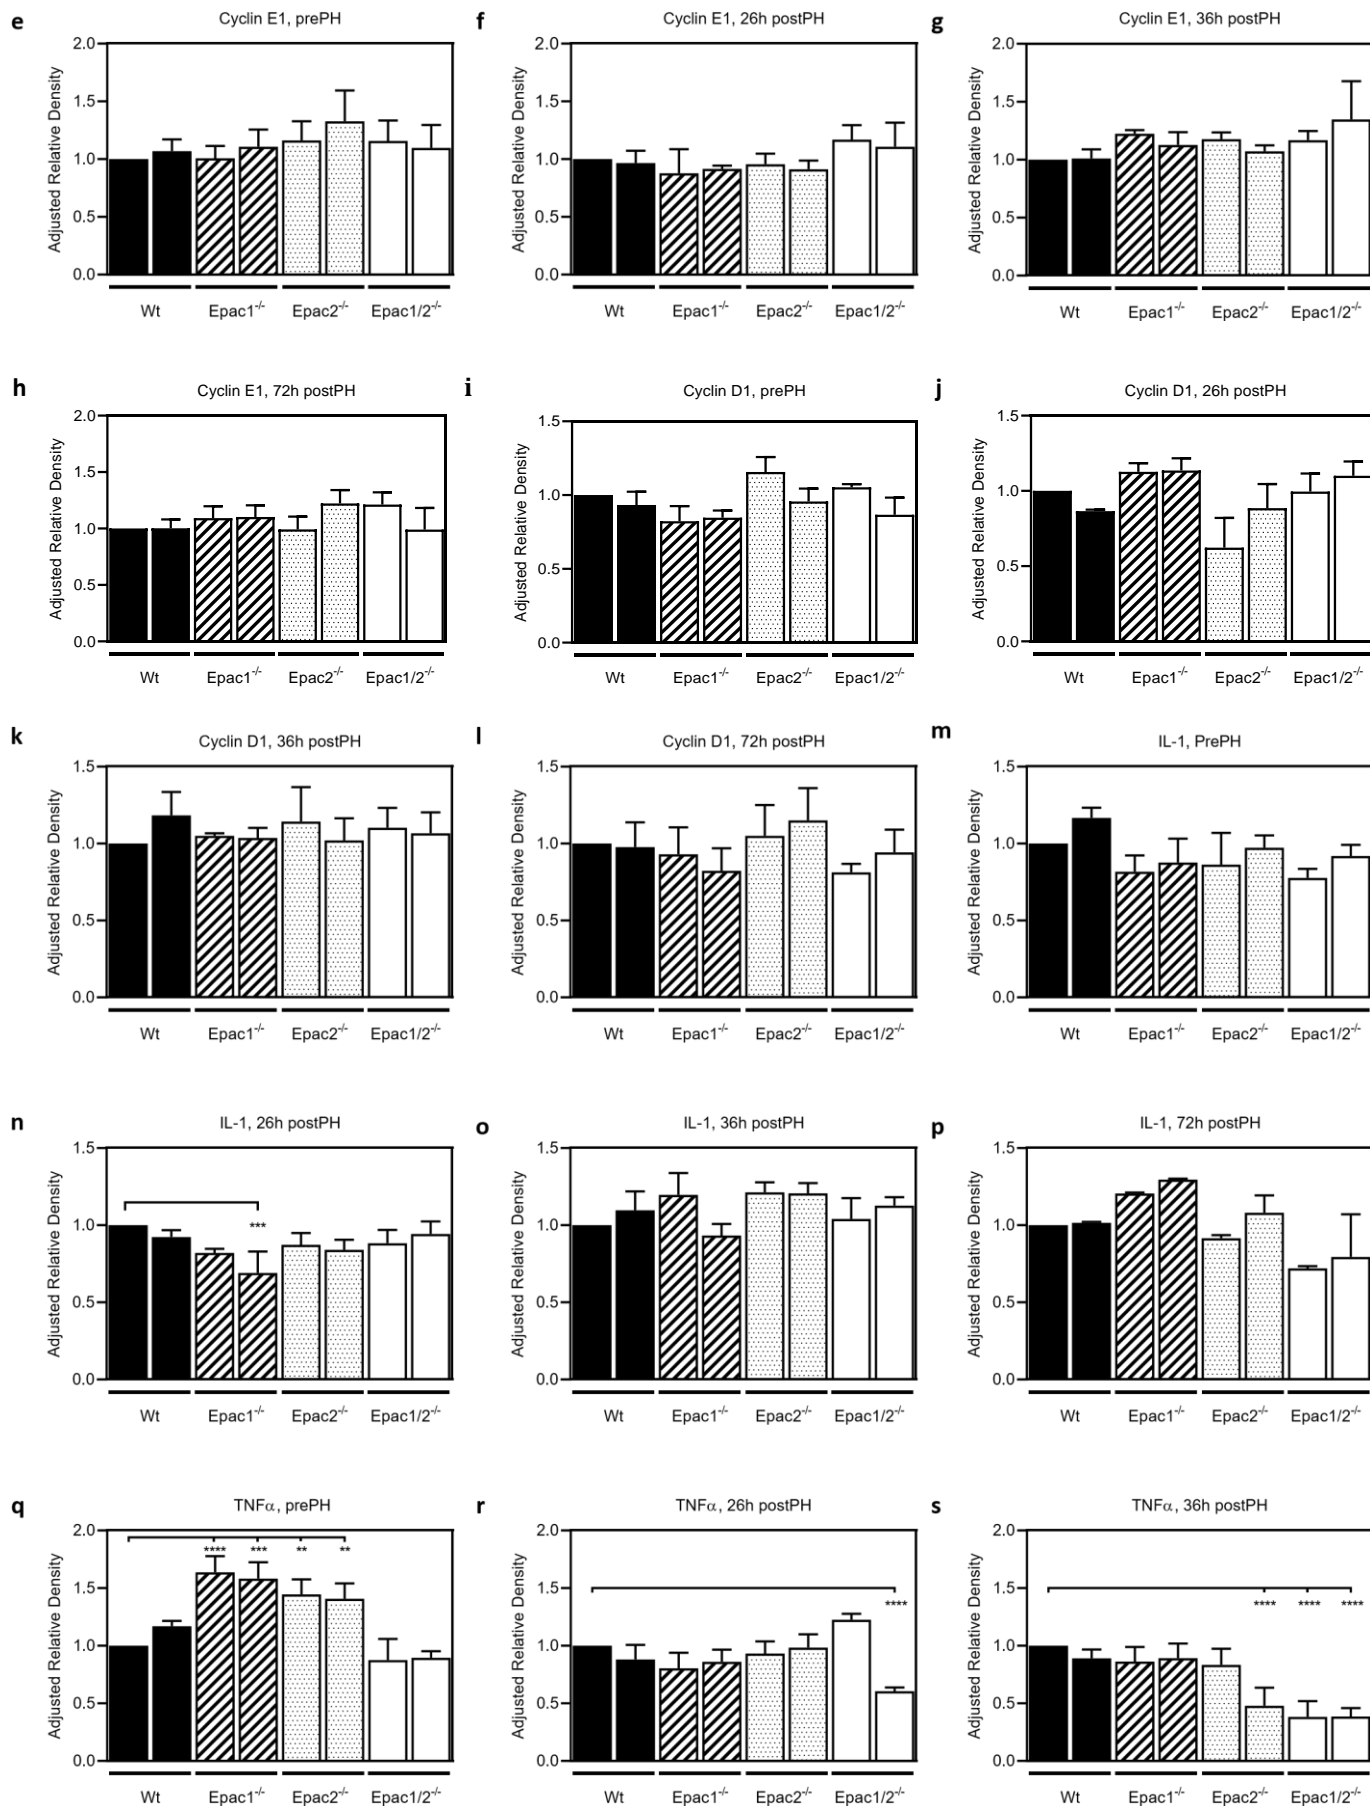

295

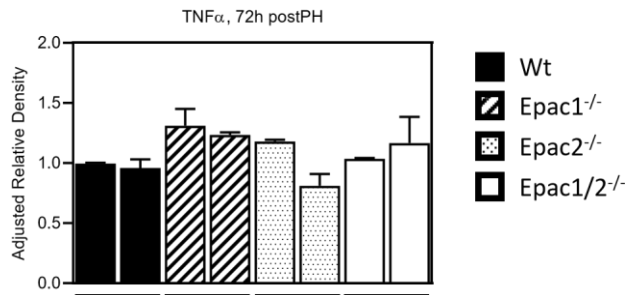

**Fig. S4. Immunoblotting of cell cycle markers.**

The expression levels of Cyclin E1, Cyclin D1, IL-1 and TNFα in wt, Epac1<sup>-/-</sup>, Epac2<sup>-/-</sup> and Epac1/2<sup>-/-</sup> mice pre- and post-PH was determined by western blotting (WB). The data is shown as mean(SD), with n=2 mice of each genotype per time point. **a-d)** Representative WB of Cyclin D1, Cyclin E1, IL-1 and TNFα expression in wt, Epac1<sup>-/-</sup>, Epac2<sup>-/-</sup> and Epac1/2<sup>-/-</sup> mice **a)** pre-, **b)** 26h-, **c)** 36h- and **d)** 72h post-PH. **e-t)** Quantification: The WB in a-d) was repeated 3-5 times, and the densitometrically determined (Cyclin E1/Cyclin D1/IL-1

339 F(7,16)=0.4.550, \*\*p=0.0058, Brown-Forsythe test, p=0.8411. **o)** Quantification of IL-1 36h  
 340 postPH; 3 WB, One-way ANOVA with Dunnett`s multiple comparison test, F(7,16)=3.679,  
 341 \*p=0.0147, Brown-Forsythe test, p=0.7765. **p)** Quantification of IL-1 72h postPH; 2 WB,  
 342 Kruskal-Wallis with Dunn`s multiple comparison test; Kruskal-Wallis statistic: 13.98,  
 343 Approximate p=0.0516  
 344  
 345 **q-t)** Quantification of TNF $\alpha$ .  
 346 **q)** Quantification of TNF $\alpha$  PrePH; 3 WB, One-way ANOVA with Dunnett`s multiple  
 347 comparison test, F(7,16)=20.11, p<0.0001, Brown-Forsythe test, p=0.7297. **r)** Quantification  
 348 of TNF $\alpha$  26h postPH; 3 WB, One-way ANOVA with Dunnett`s multiple comparison test,  
 349 F(7,16)=10.26, \*\*\*\*p<0.0001, Brown-Forsythe test, p=0.8205. **s)** Quantification of TNF $\alpha$  36h  
 350 postPH; 3 WB, One-way ANOVA with Dunnett`s multiple comparison test, F(7,16)=16.49,  
 351 \*\*\*\*p<0.0001, Brown-Forsythe test, p=0.8717. **t)** Quantification of TNF $\alpha$  72h postPH; 2 WB,  
 352 Kruskal-Wallis with Dunn`s multiple comparison test; Kruskal-Wallis statistic: 12.67,  
 353 Approximate p=0.0806.  
 354

**Supplementary Figures**  
**Fig. S5 Full length blots to Supplementary Fig.S4**

**Full length blots to Supplementary Fig.S4, PrePH**

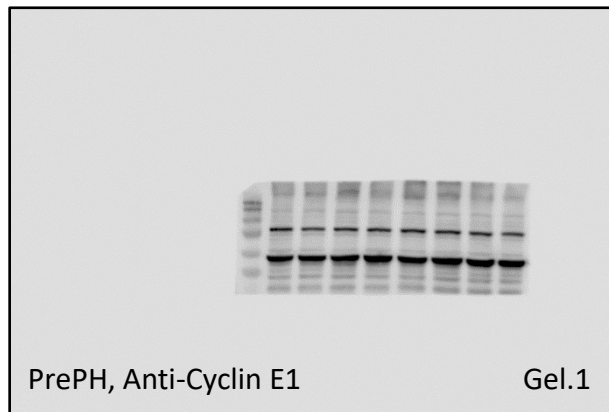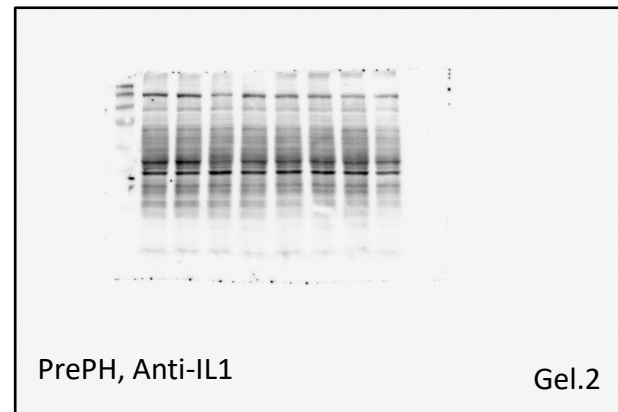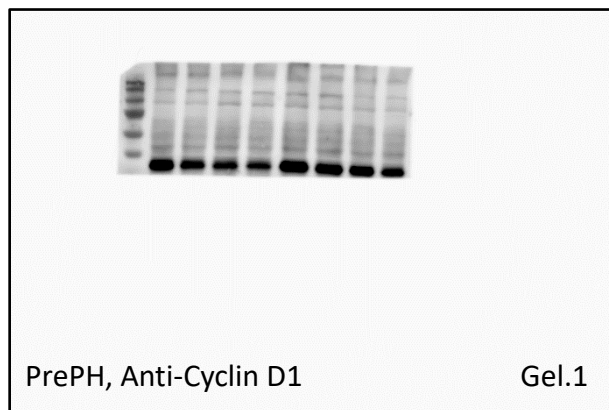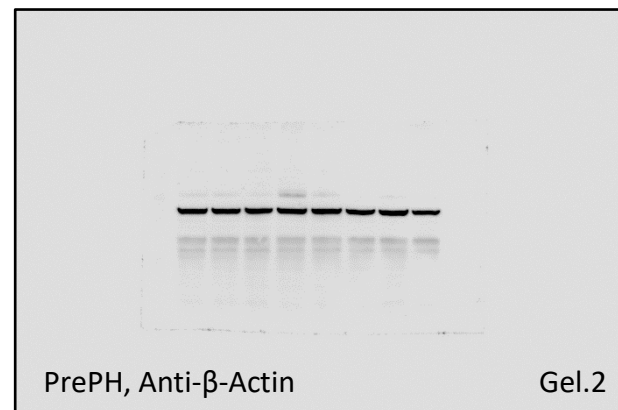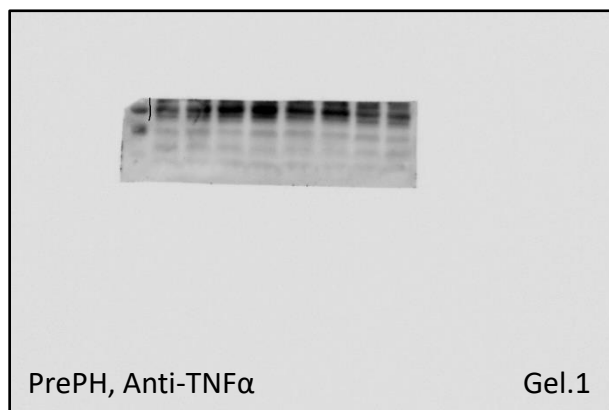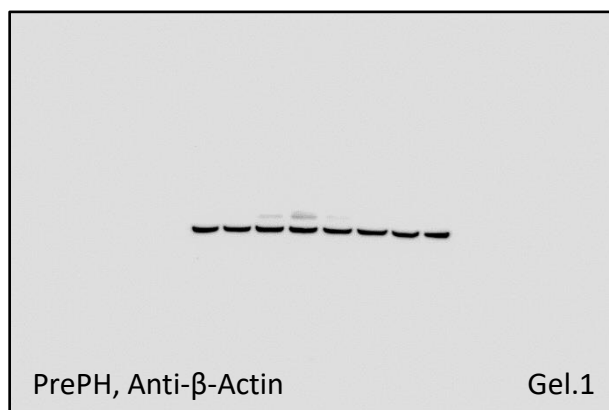

Full length blots to Supplementary Fig.S4, 26h postPH

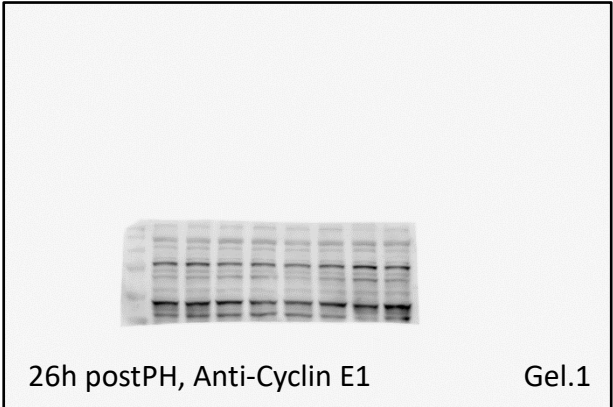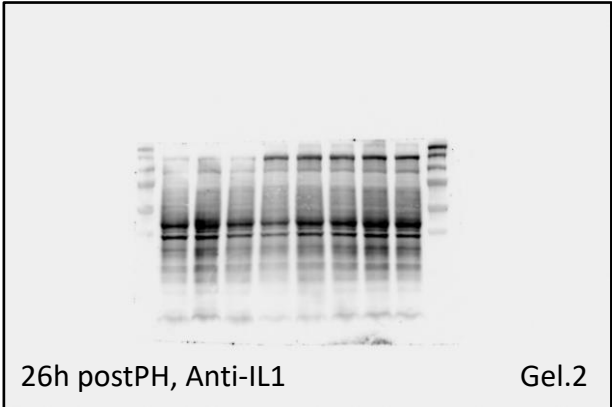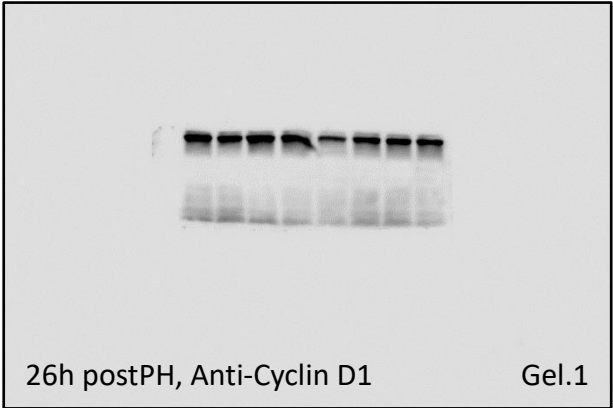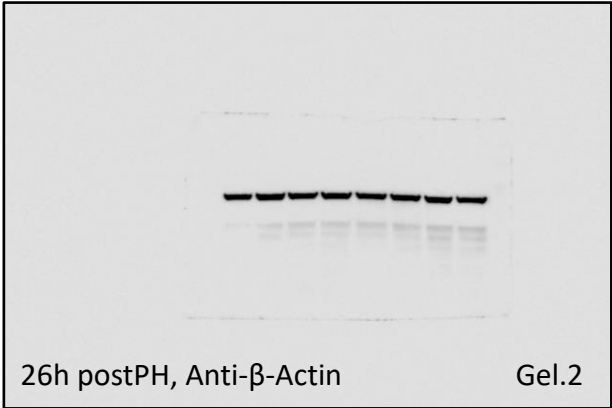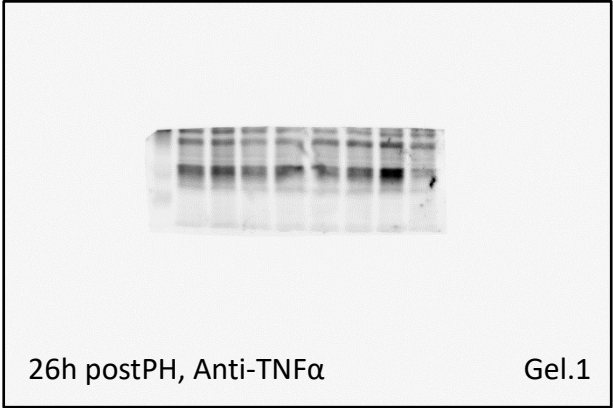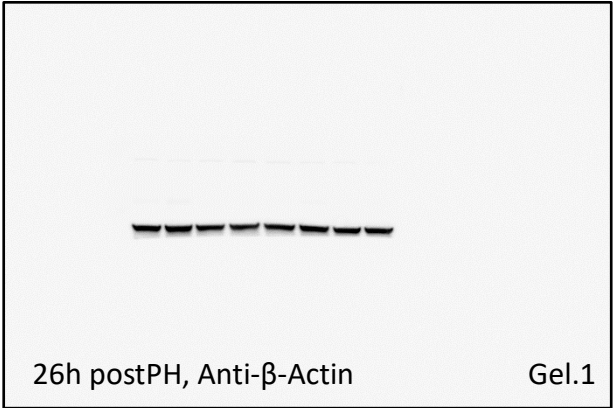

Full length blots to Supplementary Fig.S4, 36h postPH

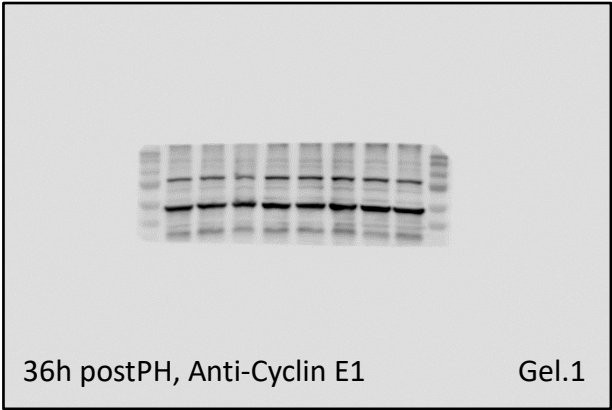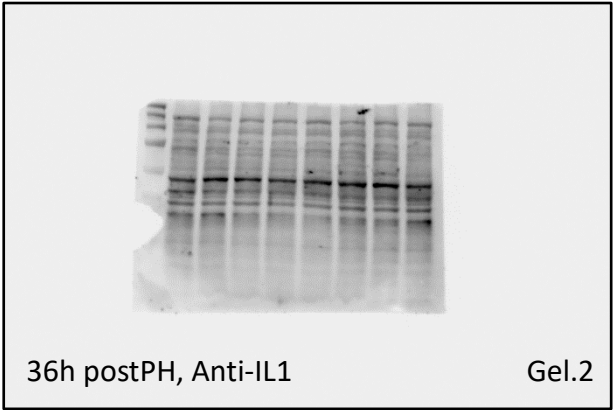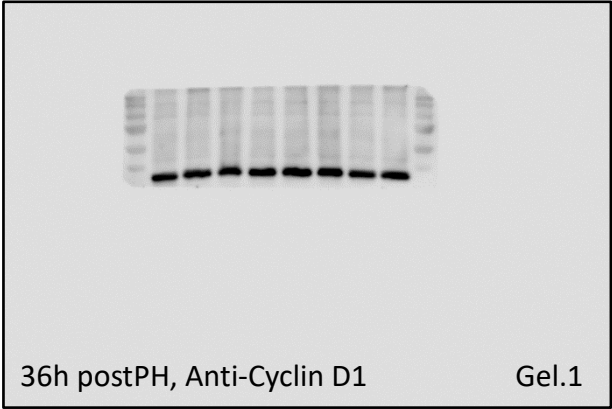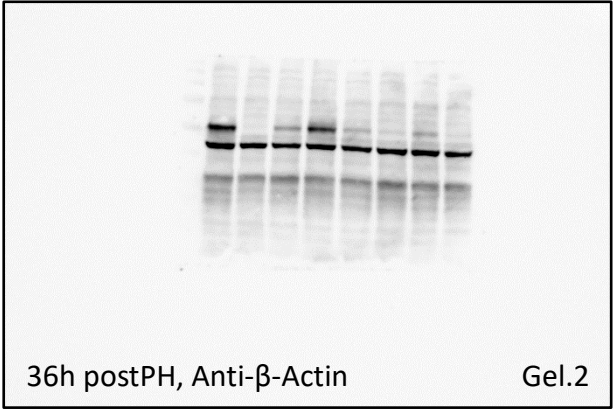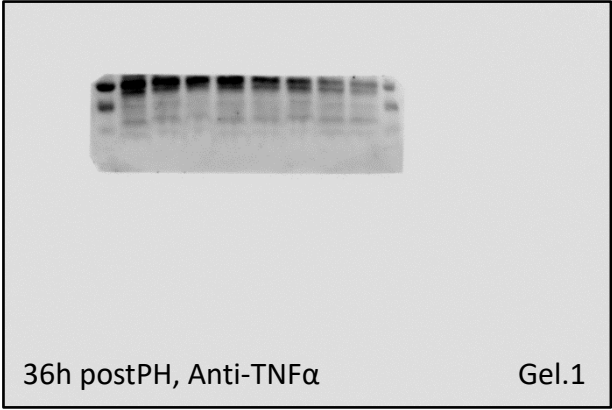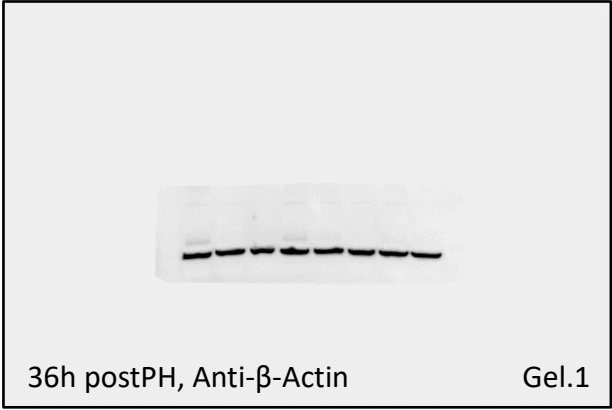

Full length blots to Supplementary Fig.S4, 72h postPH

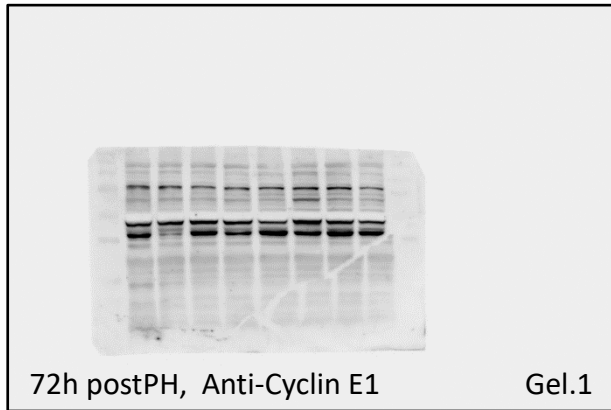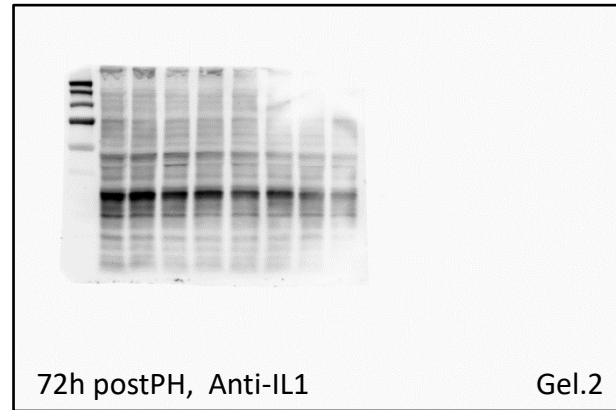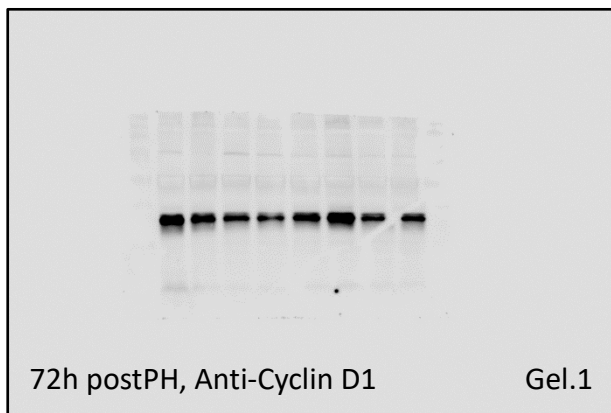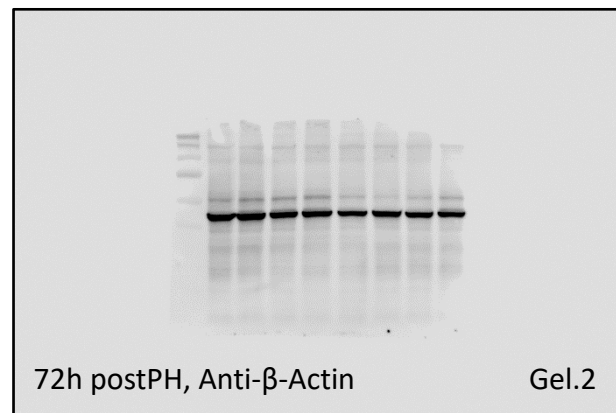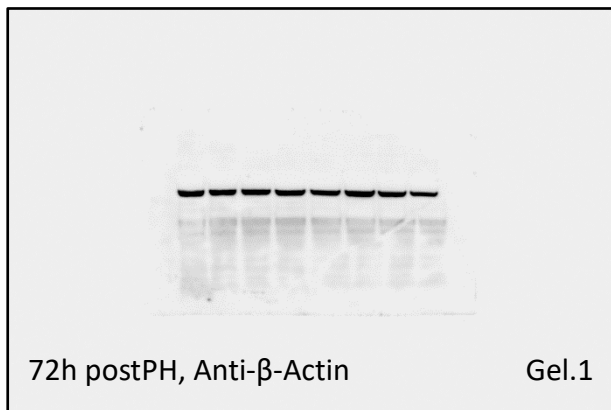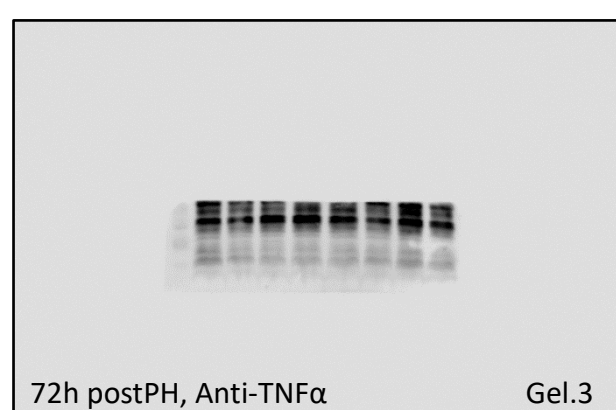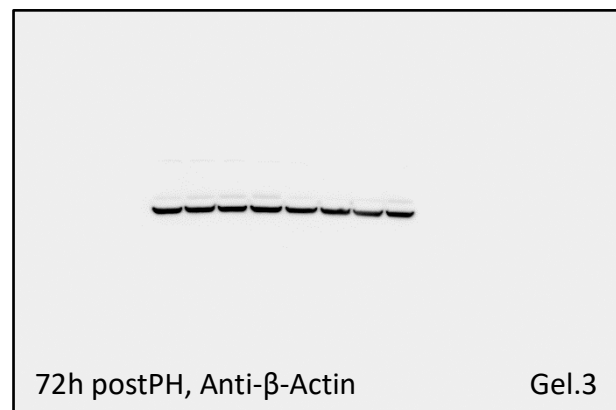

## Supplementary Figures

**Fig.S6a**

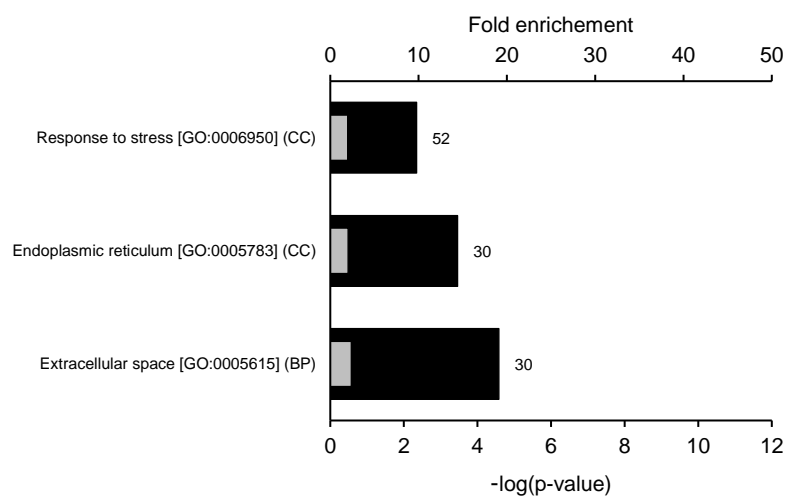

Supplementary Figures

Fig.S6b

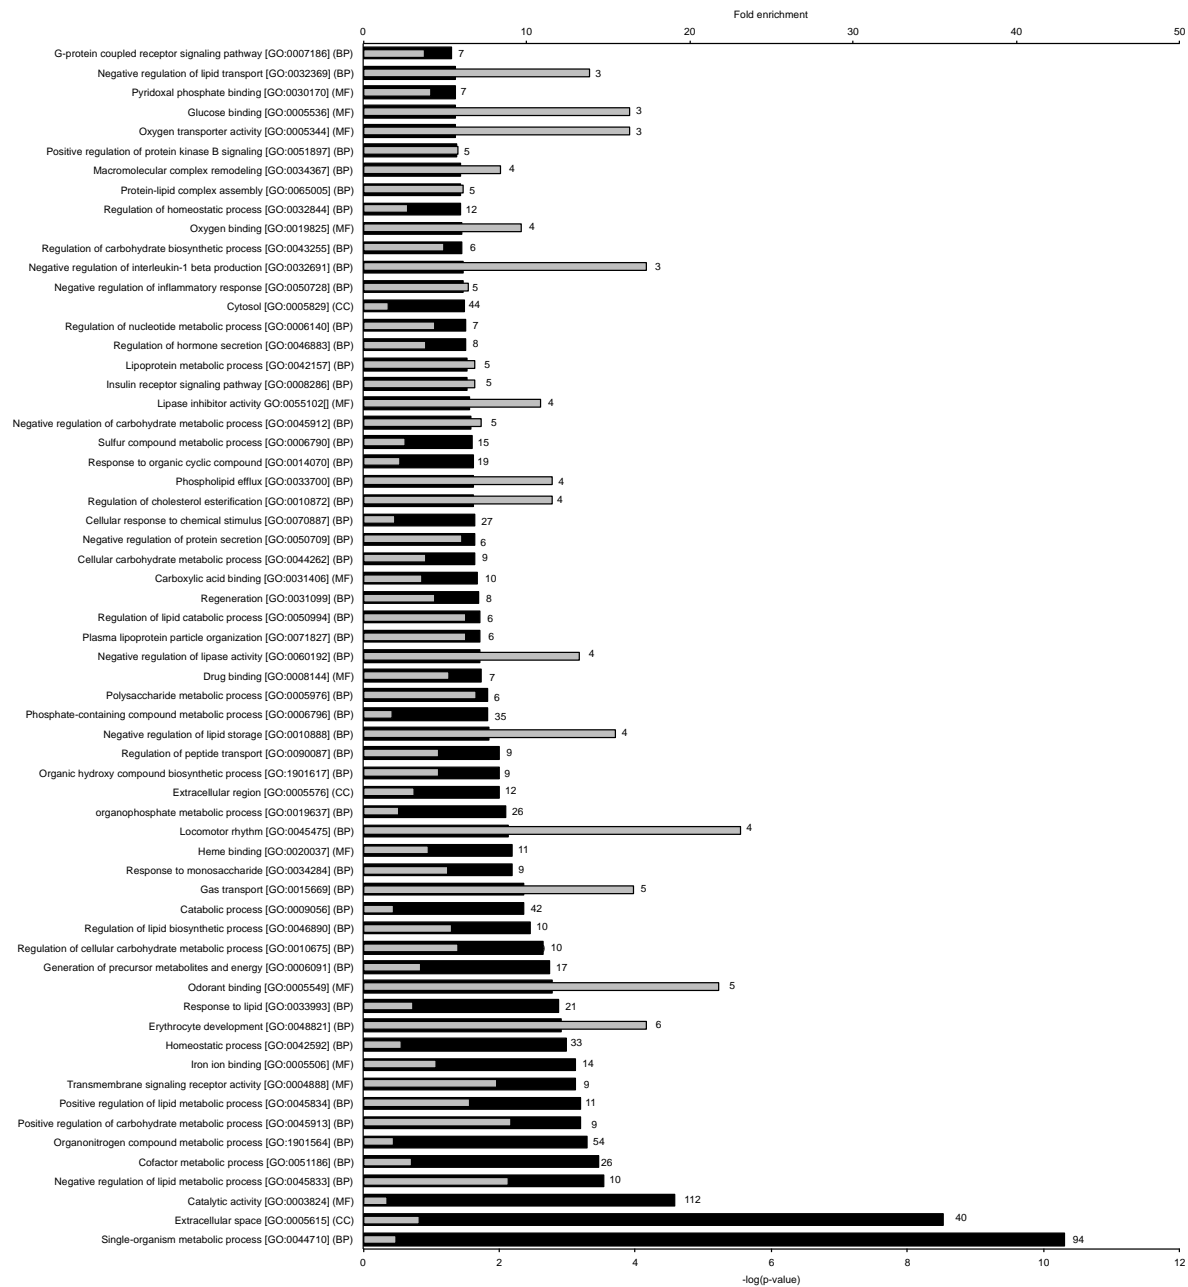

## Supplementary Figures

### Fig.S6c

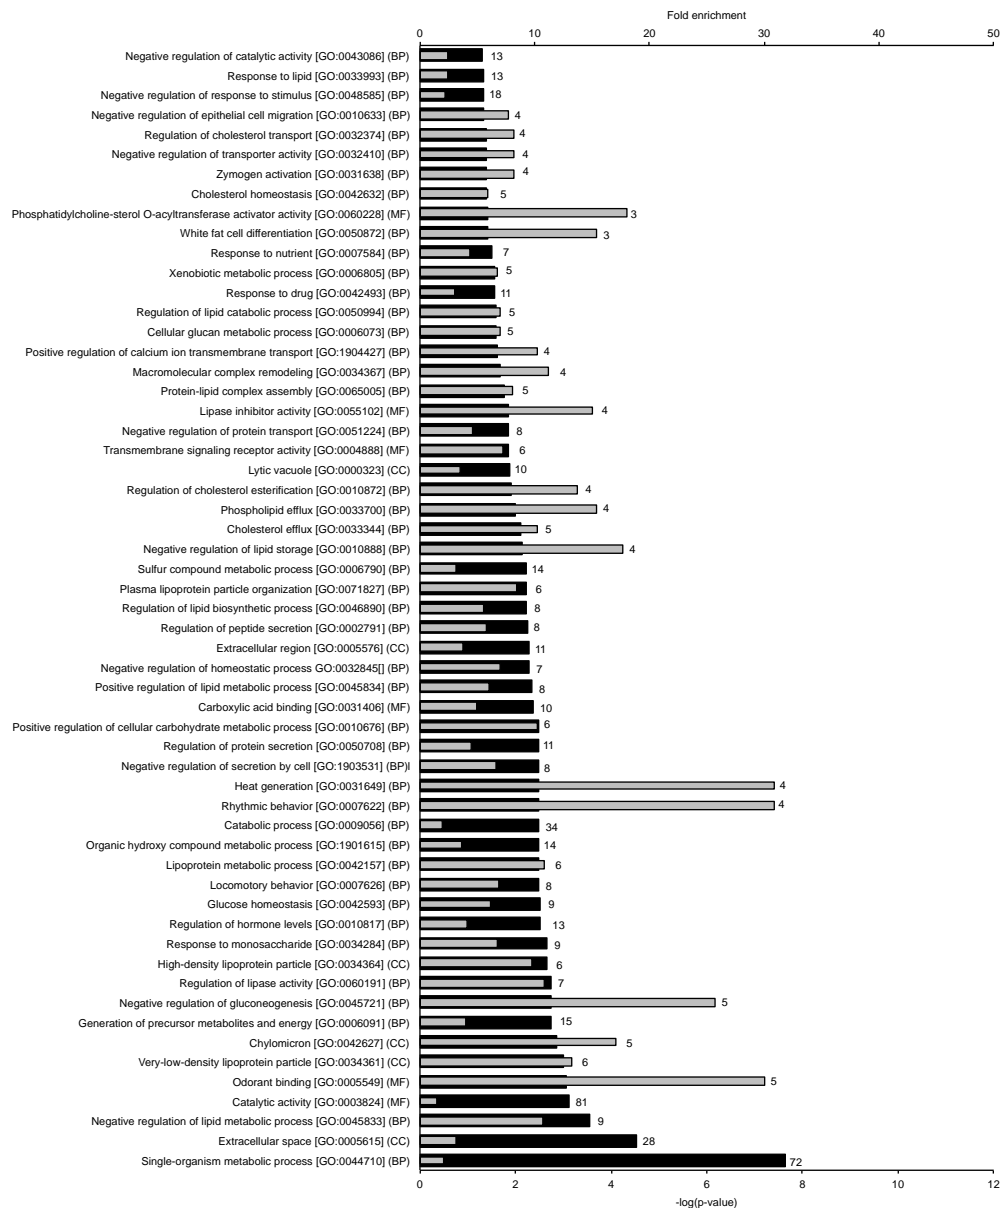

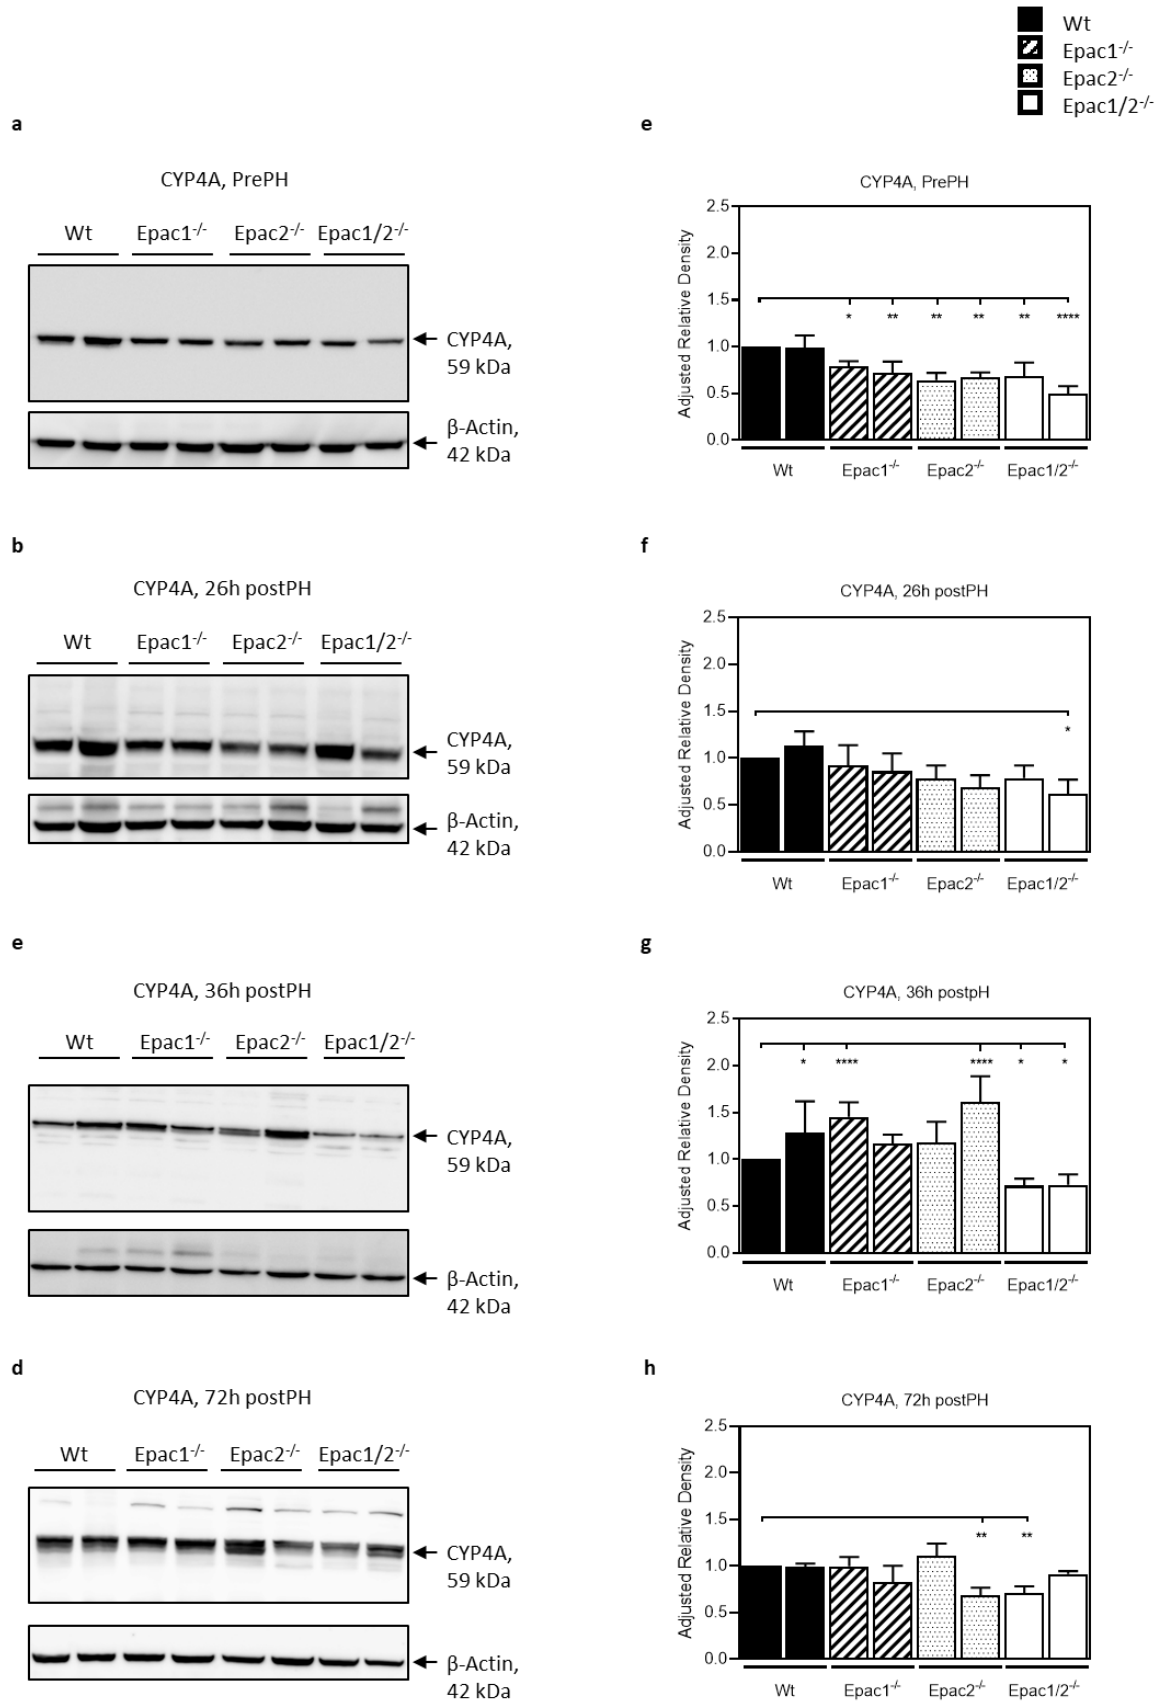

**Fig. S7. Decreased expression of CYP4A in mice deleted for Epac1/2.**

The expression levels of CYP4A in wt, Epac1<sup>-/-</sup>, Epac2<sup>-/-</sup> and Epac1/2<sup>-/-</sup> mice pre- and post-PH was determined by western blotting (WB). The data is shown as mean(SD), with n=2 mice of each genotype per time point. **a-d**) Representative WB of CYP4A expression in wt, Epac1<sup>-/-</sup>, Epac2<sup>-/-</sup> and Epac1/2<sup>-/-</sup> mice **a**) pre-, **b**) 26h-, **c**) 36h- and **d**) 72h post-PH. **e-h**) Quantification: The WB in a-d) was repeated 3-4 times, and the densitometrically determined CYP4A/β-actin ratios were normalized to the value of one wt individual (black bar to the very left) in each blot. **e**) Quantification of **a** PrePH; 3 WB, One-way ANOVA with Dunnett's multiple comparison test, F(7,16)=9.74, \*\*\*\*p<0.0001, Brown-Forsythe test, p=0.5993. **f**) Quantification of **b** 26h postPH; 3 WB, One-way ANOVA with Dunnett's multiple comparison test, F(7,16)=3.667, \*p=0.0149, Brown-Forsythe test, p=0.8555. **g**) Quantification of **c** 36h postPH; 4 WB, One-way ANOVA with Dunnett's multiple comparison test, F(7,32)=18.77, \*\*\*\*p<0.0001, Brown-Forsythe test, p=0.1108. **h**) Quantification of **d** 72h postPH; 3 WB, One-way ANOVA with Dunnett's multiple comparison test, F(7,16)=7.563, \*\*\*p=0.0004, Brown-Forsythe test, p=0.4598. The CYP4A and β-actin blots displayed in **a**) are cropped from different parts of the same Hybond™ P 0.45μm PVDF membrane, the same setup applies for CYP4A and β-actin bands displayed in b-d) (see Supplementary Figure S8 the full-length blots).

**Supplementary Figures**

**Fig. S8 Full length blots to Supplementary Fig.S7, CYP4A and  $\beta$ -Actin**

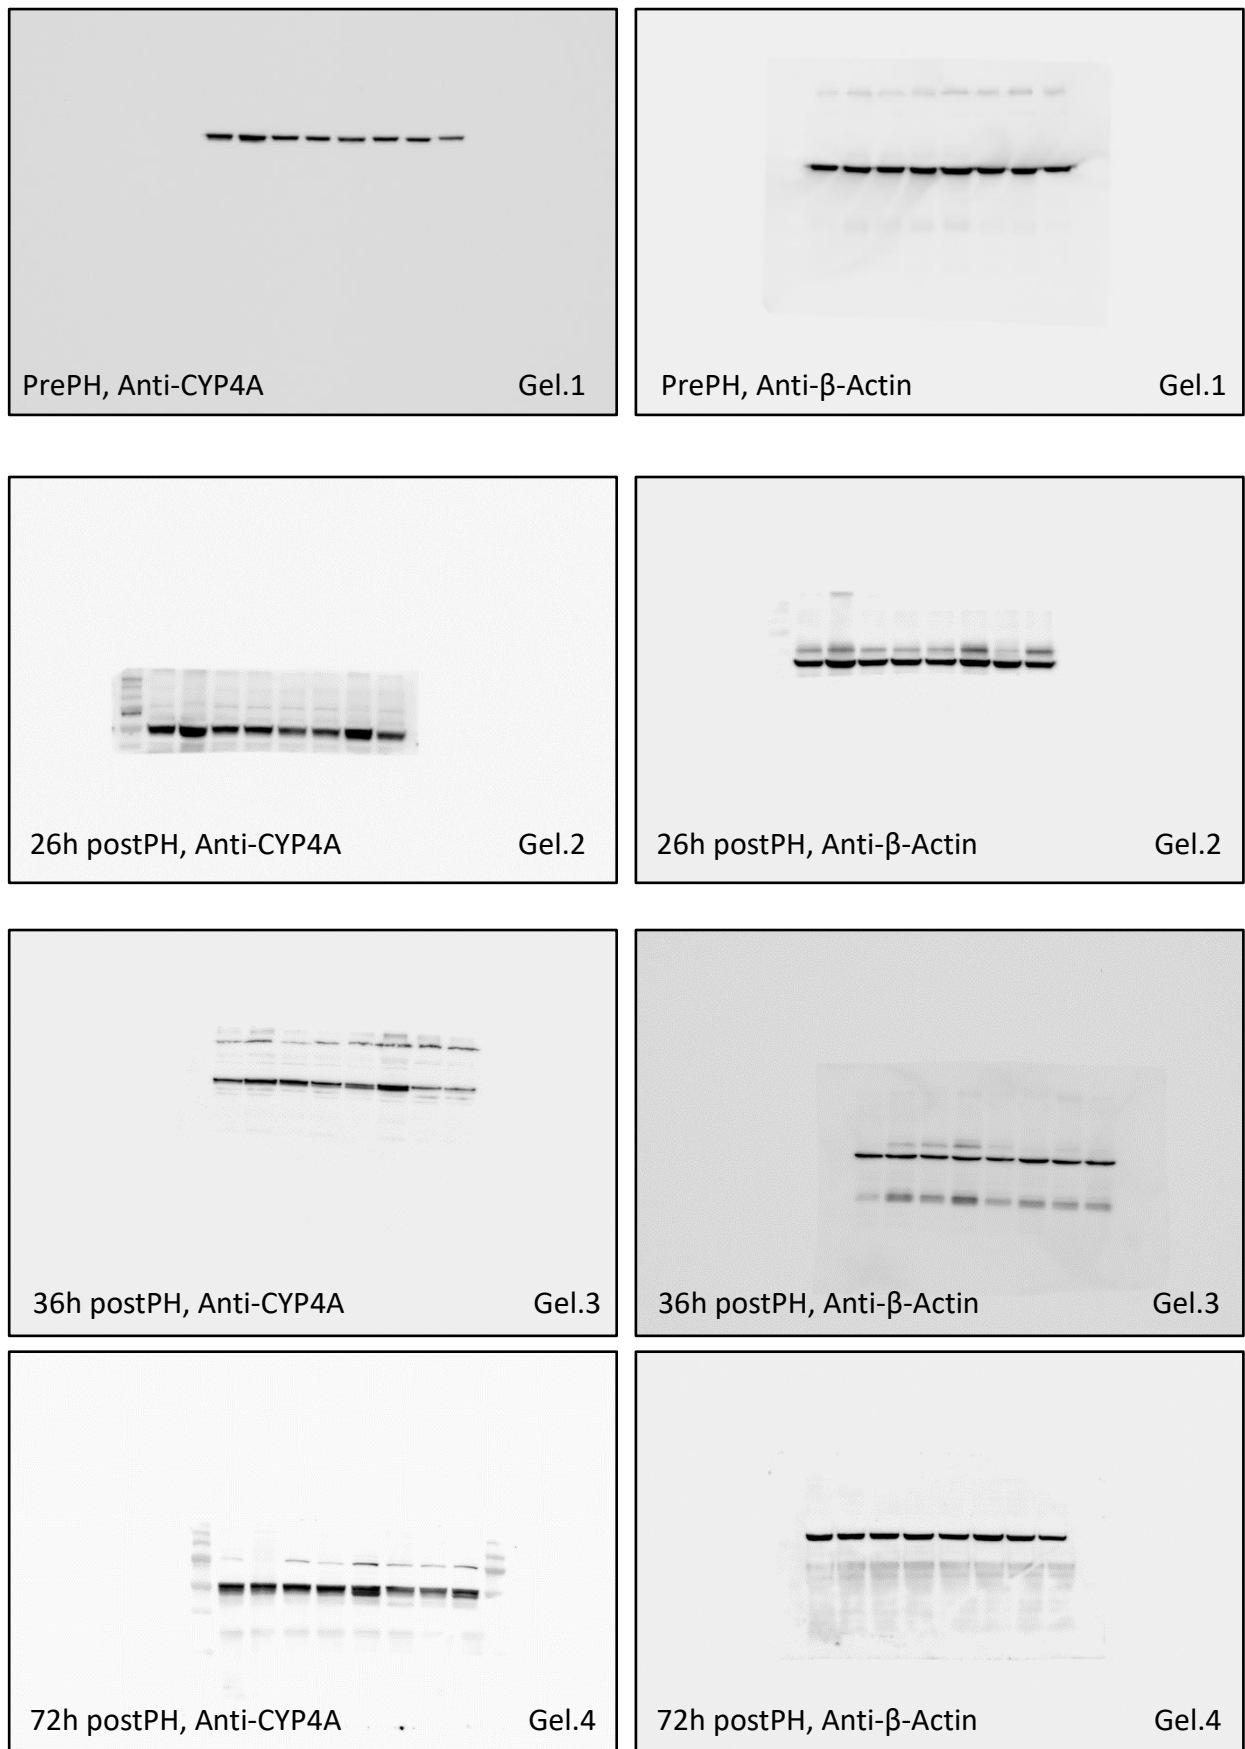

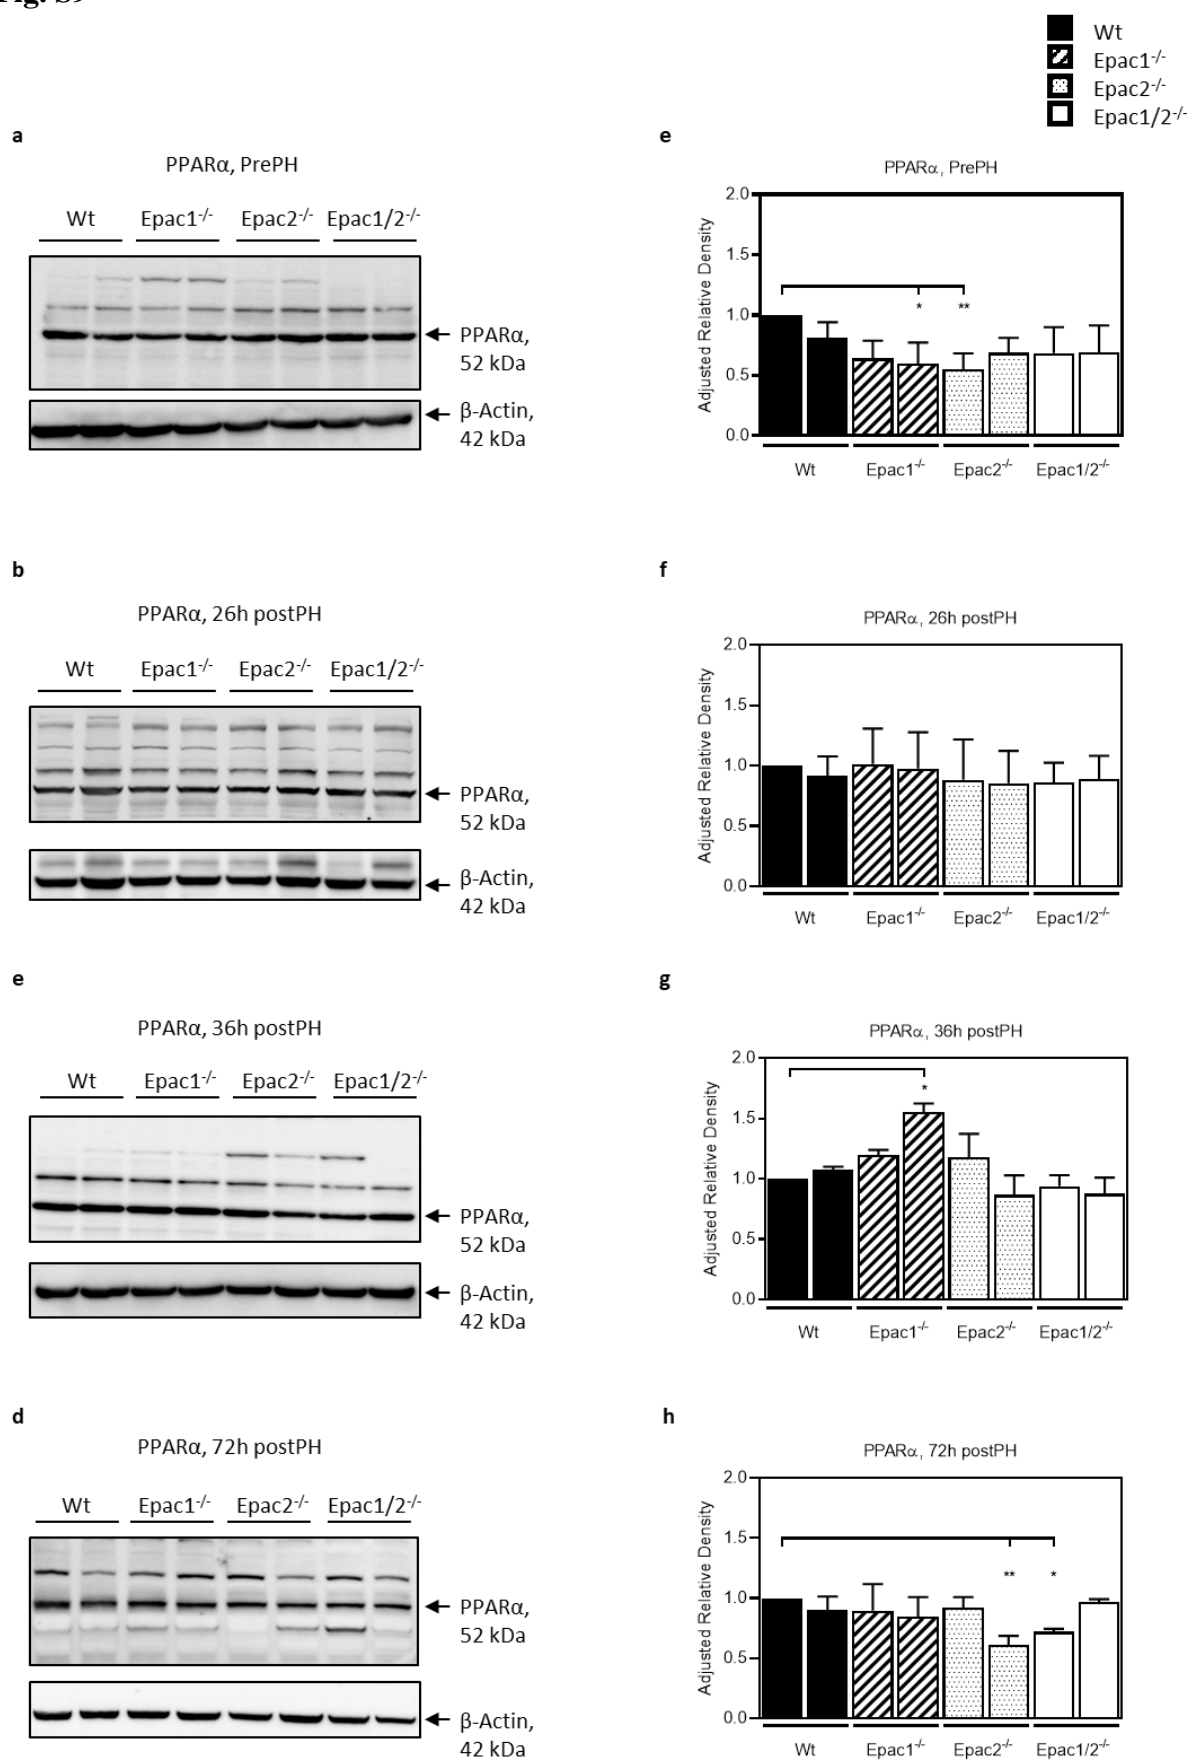

**Fig. S9. No alteration in PPAR $\alpha$  expression as a consequence of Epac1/2 deficiency.**

The expression levels of PPAR $\alpha$  in wt, Epac1<sup>-/-</sup>, Epac2<sup>-/-</sup> and Epac1/2<sup>-/-</sup> mice pre- and post-PH was determined by western blotting (WB). The data is shown as mean(SD), with n=2 mice of each genotype per timepoint. **a-d)** Representative WB of PPAR $\alpha$  expression in wt, Epac1<sup>-/-</sup>, Epac2<sup>-/-</sup> and Epac1/2<sup>-/-</sup> mice **a)** pre-, **b)** 26h-, **c)** 36h- and **d)** 72h post-PH. **e-h)** Quantification: The WB in a-d) was repeated 3-4 times, and the densitometrically determined PPAR $\alpha$ / $\beta$ -actin ratios were normalized to the value of one wt individual (black bar to the very left) in each blot. **e)** Quantification of **a** PrePH; 4 WB, Kruskal-Wallis with Dunn's multiple comparison test; Kruskal-Wallis statistic: 14.52, Approximate \*p=0.0426. **f)** Quantification of **b** 26h postPH; 3 WB, One-way ANOVA with Dunnett's multiple comparison test, F(7,16)=0.2146, p=0.9767, Brown-Forsythe test, p=0.8564. **g)** Quantification of **c** 36h postPH; 4 WB, Kruskal-Wallis with Dunn's multiple comparison test; Kruskal-Wallis statistic: 24.20, Approximate \*\*p=0.0010. **h)** Quantification of **d** 72h postPH; 3 WB, One-way ANOVA with Dunnett's multiple comparison test, F(7,16)=3.978, \*p=0.0105, Brown-Forsythe test, p=0.2428. The PPAR $\alpha$  and  $\beta$ -actin blots displayed in a) are cropped from different parts of the same Hybond<sup>TM</sup> P 0.45 $\mu$ m PVDF membrane, the same setup applies for PPAR $\alpha$  and  $\beta$ -actin bands displayed in b-d) (see Supplementary Fig. S10 the full-length blots).

# Supplementary Figures

**Fig. S10 Full length blots to Supplementary Fig.S9, PPAR $\alpha$  and  $\beta$ -Actin**

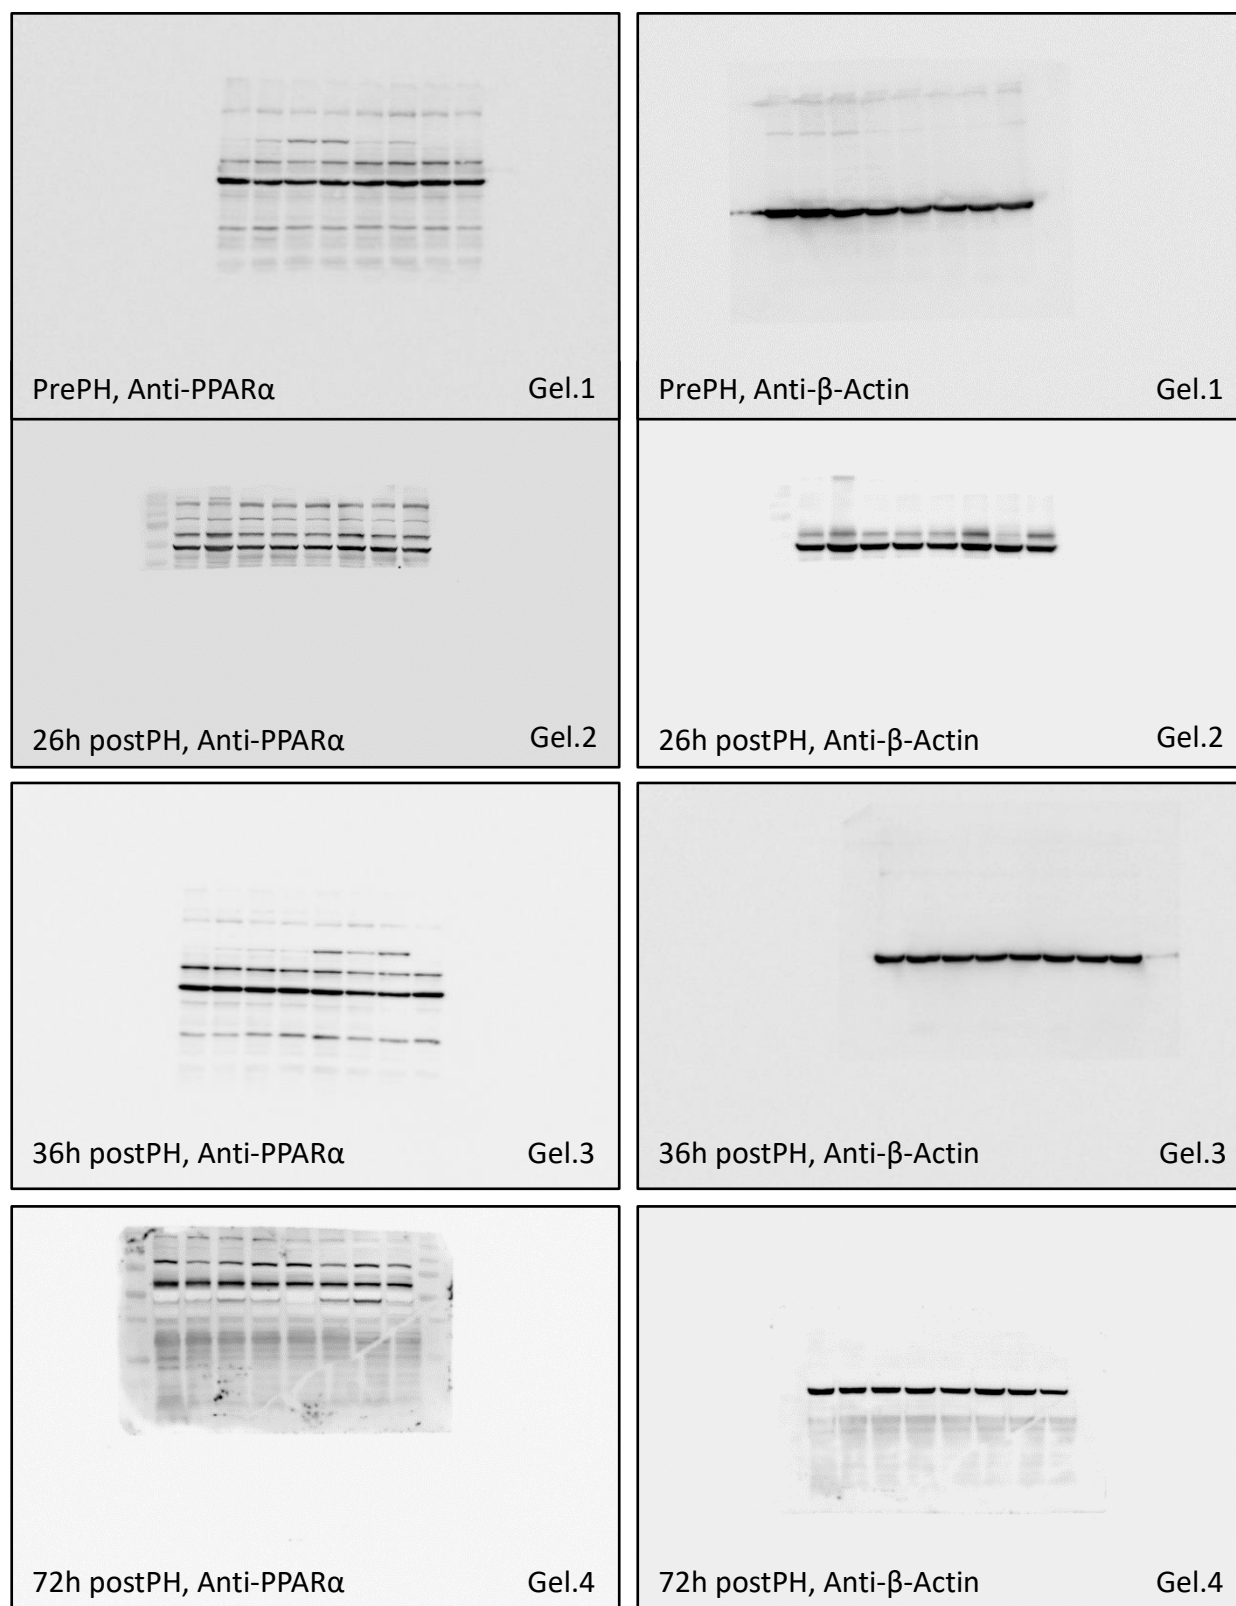

## Supplementary Tables

**Table 1A**

| ID                                                        | Gene symbol | Protein name                                                                                                       |
|-----------------------------------------------------------|-------------|--------------------------------------------------------------------------------------------------------------------|
| <b>Sulfation [GO:0051923] (BP)</b>                        |             |                                                                                                                    |
| P52840                                                    | Sult1a1     | Sulfotransferase 1A1                                                                                               |
| Q9QWG7                                                    | Sult1b1     | Sulfotransferase family cytosolic 1B member 1                                                                      |
| Q3UZZ6                                                    | Sult1d1     | Sulfotransferase 1 family member D1                                                                                |
| <b>Small molecule catabolic process [GO:0044282] (BP)</b> |             |                                                                                                                    |
| Q99K67                                                    | Aass        | Alpha-aminoadipic semialdehyde synthase, mitochondrial; Lysine ketoglutarate reductase; Saccharopine dehydrogenase |
| Q8R519                                                    | Acmsd       | 2-amino-3-carboxymuconate-6-semialdehyde decarboxylase                                                             |
| Q8VCX1                                                    | Akr1d1      | 3-oxo-5-beta-steroid 4-dehydrogenase                                                                               |
| Q9CZS1                                                    | Aldh1b1     | Aldehyde dehydrogenase X, mitochondrial                                                                            |
| Q9EP75                                                    | Cyp4f14     | Leukotriene-B4 omega-hydroxylase 3                                                                                 |
| P05201                                                    | Got1        | Aspartate aminotransferase, cytoplasmic                                                                            |
| Q9WU19                                                    | Hao1        | Hydroxyacid oxidase 1                                                                                              |
| P49429                                                    | Hpd         | 4-hydroxyphenylpyruvate dioxygenase                                                                                |
| P16331                                                    | Pah         | Phenylalanine-4-hydroxylase                                                                                        |
| Q9WU79                                                    | Prodh       | Proline dehydrogenase 1, mitochondrial                                                                             |
| Q283N4                                                    | Urad        | 2-oxo-4-hydroxy                                                                                                    |

690 **Table 1B**

| ID                                                            | Gene symbol | Protein name                                  |
|---------------------------------------------------------------|-------------|-----------------------------------------------|
| <b>Sulfur compound biosynthetic process [GO:0044272] (BP)</b> |             |                                               |
| E9Q4Z2                                                        | Acacb       | Acetyl-CoA carboxylase 2                      |
| Q8QZT1                                                        | Acat1       | Acetyl-CoA acetyltransferase, mitochondrial   |
| Q91V92                                                        | Acly        | ATP-citrate synthase                          |
| Q9DBE0                                                        | Csad        | Cysteine sulfinic acid decarboxylase          |
| <b>Carboxylic ester hydrolase activity [GO:0052689] (MF)</b>  |             |                                               |
| O55137                                                        | Acot1       | Acyl-coenzyme A thioesterase 1                |
| Q9QYR9                                                        | Acot2       | Acyl-coenzyme A thioesterase 2, mitochondrial |
| Q8VCT4                                                        | Ces1d       | Carboxylesterase 1D                           |
| Q64176                                                        | Ces1e       | Carboxylesterase 1E                           |
| Q8BK48                                                        | Ces2e       | Pyrethroid hydrolase Ces2e                    |
| O35678                                                        | Mgll        | Monoglyceride lipase                          |
| <b>Protein homodimerization activity [GO:0042803] (MF)</b>    |             |                                               |
| P55096                                                        | Abcd3       | ATP-binding cassette sub-family D member 3    |
| Q7TMS5                                                        | Abcg2       | ATP-binding cassette sub-family G member 2    |
| Q8QZT1                                                        | Acat1       | Acetyl-CoA acetyltransferase, mitochondrial   |
| Q8K4M5                                                        | Comm1       | COMM domain-containing protein 1              |
| Q9WVJ3                                                        | Cpq         | Carboxypeptidase Q                            |
| P34914                                                        | Ephx2       |                                               |

|                                                                      |         |                                                                                                     |
|----------------------------------------------------------------------|---------|-----------------------------------------------------------------------------------------------------|
| O54754                                                               | Aox1    | Aldehyde oxidase                                                                                    |
| G3X982                                                               | Aox3    | Aldehyde oxidase 3                                                                                  |
| Q8VCT4                                                               | Ces1d   | Carboxylesterase 1D                                                                                 |
| Q9WVJ3                                                               | Cpq     | Carboxypeptidase Q                                                                                  |
| Q6PEE2                                                               | Ctif    | CBP80/20-dependent translation initiation factor                                                    |
| O35459                                                               | Ech1    | Delta(3,5)-Delta(2,4)-dienoyl-CoA isomerase, mitochondrial                                          |
| P34914                                                               | Ephx2   | Bifunctional epoxide hydrolase 2;Cytosolic epoxide hydrolase 2;Lipid-phosphate phosphatase          |
| P51660                                                               | Hsd17b4 | Peroxisomal multifunctional enzyme type 2;(3R)-hydroxyacyl-CoA dehydrogenase; Enoyl-CoA hydratase 2 |
| O35678                                                               | Mgl1    | Monoglyceride lipase                                                                                |
| O89023                                                               | Tpp1    | Tripeptidyl-peptidase 1                                                                             |
| Q9QZU9                                                               | Ube2l6  | Ubiquitin/ISG15-conjugating enzyme E2 L6                                                            |
| <b>Organic hydroxy compound metabolic process [GO: 1901615] (BP)</b> |         |                                                                                                     |
| P47740                                                               | Aldh3a2 | Fatty aldehyde dehydrogenase                                                                        |
| Q8VCT4                                                               | Ces1d   | Carboxylesterase 1D                                                                                 |
| Q9WVJ3                                                               | Cpq     | Carboxypeptidase Q                                                                                  |
| Q99LB2                                                               | Dhrs4   | Dehydrogenase/reductase SDR family member 4                                                         |
| Q00612                                                               | G6pdx   | Glucose-6-phosphate 1-dehydrogenase X                                                               |
| P54869                                                               | Hmgcs2  | Hydroxymethylglutaryl-CoA synthase, mitochondrial                                                   |
| Q64FW2                                                               | Retsat  | All-trans-retinol 13,14-reductase                                                                   |

|                                                     |          |                                                                            |
|-----------------------------------------------------|----------|----------------------------------------------------------------------------|
| O88668                                              | Creg1    | Protein CREG1                                                              |
| Q91WL5                                              | Cyp4a12a | Cytochrome P450 4A12A                                                      |
| Q99LB2                                              | Dhrs4    | Dehydrogenase/reductase SDR family member 4                                |
| O35459                                              | Ech1     | Delta(3,5)-Delta(2,4)-dienoyl-CoA isomerase, mitochondrial                 |
| Q00612                                              | G6pdx    | Glucose-6-phosphate 1-dehydrogenase X                                      |
| P13707                                              | Gpd1     | Glycerol-3-phosphate dehydrogenase [NAD(+)], cytoplasmic                   |
| P51660                                              | Hsd17b4  | Peroxisomal multifunctional enzyme type 2;(3R)-hydroxyacyl-CoA hydratase 2 |
| P06801                                              | Me1      | NADP-dependent malic enzyme                                                |
| O35678                                              | Mgll     | Monoglyceride lipase                                                       |
| Q64FW2                                              | Retsat   | All-trans-retinol 13,14-reductase                                          |
| <b>Lipid catabolic process [GO:0016042] (BP)</b>    |          |                                                                            |
| P55096                                              | Abcd3    | ATP-binding cassette sub-family D member 3                                 |
| Q921H8                                              | Acaa1a   | 3-ketoacyl-CoA thiolase A, peroxisomal                                     |
| Q8QZT1                                              | Acat1    | Acetyl-CoA acetyltransferase, mitochondrial                                |
| Q9R0H0                                              | Acox1    | Peroxisomal acyl-coenzyme A oxidase 1                                      |
| Q8VCT4                                              | Ces1d    | Carboxylesterase 1D                                                        |
| O35459                                              | Ech1     | Delta(3,5)-Delta(2,4)-dienoyl-CoA isomerase, mitochondrial                 |
| Q00612                                              | G6pdx    | Glucose-6-phosphate 1-dehydrogenase X                                      |
| O35678                                              | Mgll     | Monoglyceride lipase                                                       |
| <b>Coenzyme metabolic process [GO:0006732] (BP)</b> |          |                                                                            |

|                                                           |         |                                                                                            |
|-----------------------------------------------------------|---------|--------------------------------------------------------------------------------------------|
| O35459                                                    | Ech1    | Delta(3,5)-Delta(2,4)-dienoyl-CoA isomerase, mitochondrial                                 |
| P34914                                                    | Ephx2   | Bifunctional epoxide hydrolase 2;Cytosolic epoxide hydrolase 2;Lipid-phosphate phosphatase |
| P51660                                                    | Hsd17b4 | Peroxisomal multifunctional enzyme type 2;(3R)-hydroxyacyl-CoA hydratase 2                 |
| Q9Z211                                                    | Pex11a  | Peroxisomal membrane protein 11A                                                           |
| Q9CYV5                                                    | Tmem135 | Transmembrane protein 135                                                                  |
| <b>Small molecule metabolic process [GO:0044281] (BP)</b> |         |                                                                                            |
| P55096                                                    | Abcd3   | ATP-binding cassette sub-family D member 3                                                 |
| Q7TMS5                                                    | Abcg2   | ATP-binding cassette sub-family G member 2                                                 |
| Q921H8                                                    | Acaa1a  | 3-ketoacyl-CoA thiolase A, peroxisomal                                                     |
| E9Q4Z2                                                    | Acacb   | Acetyl-CoA carboxylase 2                                                                   |
| Q8QZT1                                                    | Acat1   | Acetyl-CoA acetyltransferase, mitochondrial                                                |
| Q91V92                                                    | Acly    | ATP-citrate synthase                                                                       |
| O55137                                                    | Acot1   | Acyl-coenzyme A thioesterase 1                                                             |
| Q9QYR9                                                    | Acot2   | Acyl-coenzyme A thioesterase 2, mitochondrial                                              |
| Q9R0H0                                                    | Acox1   | Peroxisomal acyl-coenzyme A oxidase 1                                                      |
| P47740                                                    | Aldh3a2 | Fatty aldehyde dehydrogenase                                                               |
| O54754                                                    | Aox1    | Aldehyde oxidase                                                                           |
| G3X982                                                    | Aox3    | Aldehyde oxidase 3                                                                         |
| Q8VCT4                                                    | Ces1d   | Carboxylesterase 1D                                                                        |
| Q9DBE0                                                    | Csad    | Cysteine sulfinic acid decarboxylase                                                       |
|                                                           |         |                                                                                            |

|        |          |                                                                                            |
|--------|----------|--------------------------------------------------------------------------------------------|
| Q8VCT4 | Ces1d    | Carboxylesterase 1D                                                                        |
| Q91WL5 | Cyp4a12a | Cytochrome P450 4A12A                                                                      |
| Q99LB2 | Dhrs4    | Dehydrogenase/reductase SDR family member 4                                                |
| O35459 | Ech1     | Delta(3,5)-Delta(2,4)-dienoyl-CoA isomerase, mitochondrial                                 |
| P34914 | Ephx2    | Bifunctional epoxide hydrolase 2;Cytosolic epoxide hydrolase 2;Lipid-phosphate phosphatase |
| P13707 | Gpd1     | Glycerol-3-phosphate dehydrogenase [NAD(+)], cytoplasmic                                   |
| P54869 | Hmgcs2   | Hydroxymethylglutaryl-CoA synthase, mitochondrial                                          |
| P51660 | Hsd17b4  | Peroxisomal multifunctional enzyme type 2;(3R)-hydroxyacyl-CoA hydratase 2                 |
| O35678 | Mgll     | Monoglyceride lipase                                                                       |
| Q64FW2 | Retsat   | All-trans-retinol 13,14-reductase                                                          |
| Q920A5 | Scepl    | Retinoid-inducible serine carboxypeptidase                                                 |

**Supplementary Table. 1B** Overview of the proteins identified for each GO term for proteins with decreased expression pre-PH in Epac1/2<sup>-/-</sup> mice compared to wt mice.

**Table 2**

| ID                                                | Gene symbol | Protein name                            |
|---------------------------------------------------|-------------|-----------------------------------------|
| <b>Sulfur compound binding [GO: 1901681] (MF)</b> |             |                                         |
| Q80XL6                                            | Acad11      | Acyl-CoA dehydrogenase family member 11 |
| P51174                                            | Acadl       | Long-chain specific                     |

|                                                                  |        |                                                                                                                    |
|------------------------------------------------------------------|--------|--------------------------------------------------------------------------------------------------------------------|
| P45952                                                           | Acadm  | Medium-chain specific acyl-CoA dehydrogenase, mitochondrial                                                        |
| P47934                                                           | Crat   | Carnitine O-acetyltransferase                                                                                      |
| <b>Dodecenoyl-CoA delta-isomerase activity [GO:0004165] (MF)</b> |        |                                                                                                                    |
| P42125                                                           | Eci1   | Enoyl-CoA delta isomerase 1, mitochondrial                                                                         |
| Q9WUR2-2                                                         | Eci2   | Enoyl-CoA delta isomerase 2, mitochondrial                                                                         |
| Q9DBM2                                                           | Ehhadh | Peroxisomal bifunctional enzyme; Enoyl-CoA hydratase/3,2-trans-enoil-CoA isomerase;3-hydroxyacyl-CoA dehydrogenase |
| <b>Palmitoyl-CoA hydrolase activity [GO:0016290] (MF)</b>        |        |                                                                                                                    |
| O55137                                                           | Acot1  | Acyl-coenzyme A thioesterase 1                                                                                     |
| Q9QYR9                                                           | Acot2  | Acyl-coenzyme A thioesterase 2, mitochondrial                                                                      |
| Q8BWN8                                                           | Acot4  | Acyl-coenzyme A thioesterase 4                                                                                     |
| O88531                                                           | Ppt1   | Palmitoyl-protein thioesterase 1                                                                                   |
| <b>Coenzyme binding [GO:0050662] (MF)</b>                        |        |                                                                                                                    |
| Q80XL6                                                           | Acad11 | Acyl-CoA dehydrogenase family member 11                                                                            |
| P51174                                                           | Acadl  | Long-chain specific acyl-CoA dehydrogenase, mitochondrial                                                          |
| P45952                                                           | Acadm  | Medium-chain specific acyl-CoA dehydrogenase, mitochondrial                                                        |
| Q9R0H0                                                           | Acox1  | Peroxisomal acyl-coenzyme A oxidase 1                                                                              |
| O54754                                                           | Aox1   | Aldehyde oxidase                                                                                                   |
| Q9CQ62                                                           | Decr1  | 2,4-dienoyl-CoA reductase, mitochondrial                                                                           |
| Q9WUR2                                                           |        |                                                                                                                    |

|        |         |                                                                                                                    |
|--------|---------|--------------------------------------------------------------------------------------------------------------------|
| O55137 | Acot1   | Acyl-coenzyme A thioesterase 1                                                                                     |
| Q9QYR9 | Acot2   | Acyl-coenzyme A thioesterase 2, mitochondrial                                                                      |
| Q9R0H0 | Acox1   | Peroxisomal acyl-coenzyme A oxidase 1                                                                              |
| P41216 | Acs11   | Long-chain-fatty-acid--CoA ligase 1                                                                                |
| Q14DH7 | Acss3   | Acyl-CoA synthetase short-chain family member 3, mitochondrial                                                     |
| Q80V03 | Adck5   | Uncharacterized aarF domain-containing protein kinase 5                                                            |
| P47740 | Aldh3a2 | Fatty aldehyde dehydrogenase                                                                                       |
| Q80XN0 | Bdh1    | D-beta-hydroxybutyrate dehydrogenase, mitochondrial                                                                |
| P56392 | Cox7a1  | Cytochrome c oxidase subunit 7A1, mitochondrial                                                                    |
| P52825 | Cpt2    | Carnitine O-palmitoyltransferase 2, mitochondrial                                                                  |
| P47934 | Crat    | Carnitine O-acetyltransferase                                                                                      |
| Q9CWS0 | Ddah1   | N(G),N(G)-dimethylarginine dimethylaminohydrolase 1                                                                |
| Q9CQ62 | Decr1   | 2,4-dienoyl-CoA reductase, mitochondrial                                                                           |
| Q99LB2 | Dhrs4   | Dehydrogenase/reductase SDR family member 4                                                                        |
| O35459 | Ech1    | Delta(3,5)-Delta(2,4)-dienoyl-CoA isomerase, mitochondrial                                                         |
| P42125 | Eci1    | Enoyl-CoA delta isomerase 1, mitochondrial                                                                         |
| Q9WUR2 | Eci2    | Enoyl-CoA delta isomerase 2, mitochondrial                                                                         |
| Q9DBM2 | Ehhadh  | Peroxisomal bifunctional enzyme; Enoyl-CoA hydratase/3,2-trans-enoil-CoA isomerase;3-hydroxyacyl-CoA dehydrogenase |
| Q5FW57 | Gm4952  | Gly                                                                                                                |

|                                                      |          |                                                                                                                    |
|------------------------------------------------------|----------|--------------------------------------------------------------------------------------------------------------------|
| O88833                                               | Cyp4a10  | Cytochrome P450 4A10                                                                                               |
| Q91WL5                                               | Cyp4a12a | Cytochrome P450 4A12A                                                                                              |
| O35728                                               | Cyp4a14  | Cytochrome P450 4A14                                                                                               |
| Q9CQ62                                               | Decr1    | 2,4-dienoyl-CoA reductase, mitochondrial                                                                           |
| Q9WV68                                               | Decr2    | Peroxisomal 2,4-dienoyl-CoA reductase                                                                              |
| Q99LB2                                               | Dhrs4    | Dehydrogenase/reductase SDR family member 4                                                                        |
| Q9DBM2                                               | Ehhadh   | Peroxisomal bifunctional enzyme; Enoyl-CoA hydratase/3,2-trans-enoyl-CoA isomerase;3-hydroxyacyl-CoA dehydrogenase |
| P13707                                               | Gpd1     | Glycerol-3-phosphate dehydrogenase [NAD(+)], cytoplasmic                                                           |
| P46412                                               | Gpx3     | Glutathione peroxidase 3                                                                                           |
| Q99L13                                               | Hibadh   | 3-hydroxyisobutyrate dehydrogenase, mitochondrial                                                                  |
| P51660                                               | Hsd17b4  | Peroxisomal multifunctional enzyme type 2;(3R)-hydroxyacyl-CoA dehydrogenase; Enoyl-CoA hydratase 2                |
| Q9Z2G9                                               | Htatip2  | Oxidoreductase HTATIP2                                                                                             |
| Q64133                                               | Maoa     | Amine oxidase [flavin-containing] A                                                                                |
| P06801                                               | Me1      | NADP-dependent malic enzyme                                                                                        |
| Q64FW2                                               | Retsat   | All-trans-retinol 13,14-reductase                                                                                  |
| <b>Oxidation-reduction process [GO:0055114] (BP)</b> |          |                                                                                                                    |
| Q3UNZ8                                               |          | Quinone oxidoreductase-like protein 2                                                                              |
| Q921H8                                               | Acaa1a   | 3-ketoacyl-CoA thiolase A, peroxisomal                                                                             |
| Q8VCH0                                               | Acaa1b   | 3-ketoacy                                                                                                          |

|                                                  |         |                                                                                                                    |
|--------------------------------------------------|---------|--------------------------------------------------------------------------------------------------------------------|
| Q9Z2G9                                           | Htati2  | Oxidoreductase HTATIP2                                                                                             |
| Q64133                                           | Maoa    | Amine oxidase [flavin-containing] A                                                                                |
| P06801                                           | Me1     | NADP-dependent malic enzyme                                                                                        |
| Q9D0K1                                           | Pex13   | Peroxisomal membrane protein PEX13                                                                                 |
| Q64FW2                                           | Retsat  | All-trans-retinol 13,14-reductase                                                                                  |
| <b>Lipid catabolic process [GO:0016042] (BP)</b> |         |                                                                                                                    |
| Q8R2Y0-<br>2-688832                              | Abhd6   | Monoacylglycerol lipase ABHD6                                                                                      |
| Q921H8                                           | Acaa1a  | 3-ketoacyl-CoA thiolase A, peroxisomal                                                                             |
| Q8VCH0                                           | Acaa1b  | 3-ketoacyl-CoA thiolase B, peroxisomal                                                                             |
| Q80XL6                                           | Acad11  | Acyl-CoA dehydrogenase family member 11                                                                            |
| P51174                                           | Acadl   | Long-chain specific acyl-CoA dehydrogenase, mitochondrial                                                          |
| P45952                                           | Acadm   | Medium-chain specific acyl-CoA dehydrogenase, mitochondrial                                                        |
| Q9R0H0                                           | Acox1   | Peroxisomal acyl-coenzyme A oxidase 1                                                                              |
| O88833                                           | Cyp4a10 | Cytochrome P450 4A10                                                                                               |
| Q9CQ62                                           | Decr1   | 2,4-dienoyl-CoA reductase, mitochondrial                                                                           |
| O35459                                           | Ech1    | Delta(3,5)-Delta(2,4)-dienoyl-CoA isomerase, mitochondrial                                                         |
| P42125                                           | Eci1    | Enoyl-CoA delta isomerase 1, mitochondrial                                                                         |
| Q9DBM2                                           | Ehhadh  | Peroxisomal bifunctional enzyme; Enoyl-CoA hydratase/3,2-trans-enoyl-CoA isomerase;3-hydroxyacyl-CoA dehydrogenase |
| P51660                                           | Hsd17b4 | Peroxisomal multifunction                                                                                          |

| <b>Monocarboxylic acid metabolic process [GO:0032787] (BP)</b> |          |                                                             |
|----------------------------------------------------------------|----------|-------------------------------------------------------------|
| Q921H8                                                         | Acaa1a   | 3-ketoacyl-CoA thiolase A, peroxisomal                      |
| Q8VCH0                                                         | Acaa1b   | 3-ketoacyl-CoA thiolase B, peroxisomal                      |
| Q80XL6                                                         | Acad11   | Acyl-CoA dehydrogenase family member 11                     |
| P51174                                                         | Acadl    | Long-chain specific acyl-CoA dehydrogenase, mitochondrial   |
| P45952                                                         | Acadm    | Medium-chain specific acyl-CoA dehydrogenase, mitochondrial |
| O55137                                                         | Acot1    | Acyl-coenzyme A thioesterase 1                              |
| Q9QYR9                                                         | Acot2    | Acyl-coenzyme A thioesterase 2, mitochondrial               |
| Q8BWN8                                                         | Acot4    | Acyl-coenzyme A thioesterase 4                              |
| Q9R0H0                                                         | Acox1    | Peroxisomal acyl-coenzyme A oxidase 1                       |
| P41216                                                         | Acs11    | Long-chain-fatty-acid--CoA ligase 1                         |
| P52825                                                         | Cpt2     | Carnitine O-palmitoyltransferase 2, mitochondrial           |
| P47934                                                         | Crat     | Carnitine O-acetyltransferase                               |
| O88833                                                         | Cyp4a10  | Cytochrome P450 4A10                                        |
| Q91WL5                                                         | Cyp4a12a | Cytochrome P450 4A12A                                       |
| Q9CQ62                                                         | Decr1    | 2,4-dienoyl-CoA reductase, mitochondrial                    |
| Q9WV68                                                         | Decr2    | Peroxisomal 2,4-dienoyl-CoA reductase                       |
| O35459                                                         | Ech1     | Delta(3,5)-Delta(2,4)-dienoyl-CoA isomerase, mitochondrial  |
| P42125                                                         | Eci1     | Enoyl-CoA delta isomerase 1, mitochondrial                  |
| Q9DBM2                                                         | Ehhadh</ |                                                             |

|                                    |         |                                                                                                                    |
|------------------------------------|---------|--------------------------------------------------------------------------------------------------------------------|
| Q9CQ62                             | Decr1   | 2,4-dienoyl-CoA reductase, mitochondrial                                                                           |
| Q9WV68                             | Decr2   | Peroxisomal 2,4-dienoyl-CoA reductase                                                                              |
| Q99LB2                             | Dhrs4   | Dehydrogenase/reductase SDR family member 4                                                                        |
| O35459                             | Ech1    | Delta(3,5)-Delta(2,4)-dienoyl-CoA isomerase, mitochondrial                                                         |
| P42125                             | Eci1    | Enoyl-CoA delta isomerase 1, mitochondrial                                                                         |
| Q9DBM2                             | Ehhadh  | Peroxisomal bifunctional enzyme; Enoyl-CoA hydratase/3,2-trans-enoil-CoA isomerase;3-hydroxyacyl-CoA dehydrogenase |
| P34914                             | Ephx2   | Bifunctional epoxide hydrolase 2;Cytosolic epoxide hydrolase 2;Lipid-phosphate phosphatase                         |
| P13707                             | Gpd1    | Glycerol-3-phosphate dehydrogenase [NAD(+)], cytoplasmic                                                           |
| P54869                             | Hmgcs2  | Hydroxymethylglutaryl-CoA synthase, mitochondrial                                                                  |
| P51660                             | Hsd17b4 | Peroxisomal multifunctional enzyme type 2;(3R)-hydroxyacyl-CoA hydratase 2                                         |
| Q99PI5                             | Lpin2   | Phosphatidate phosphatase LPIN2                                                                                    |
| Q9D0K1                             | Pex13   | Peroxisomal membrane protein PEX13                                                                                 |
| Q00724                             | Rbp4    | Retinol-binding protein 4                                                                                          |
| Q64FW2                             | Retsat  | All-trans-retinol 13,14-reductase                                                                                  |
| <b>Microbody [GO:0042579] (CC)</b> |         |                                                                                                                    |
| Q921H8                             | Acaa1a  | 3-ketoacyl-CoA thiolase A, peroxisomal                                                                             |
| Q8VCH0                             | Acaa1b  | 3-ketoacyl-CoA thiolase B, peroxisomal                                                                             |

703  
704  
705

**Table 3.**

| ID     | Gene symbol | Protein name                                                                                                     | prePH<br>FC | postPH<br>FC |
|--------|-------------|------------------------------------------------------------------------------------------------------------------|-------------|--------------|
| Q99K67 | Aass        | Alpha-aminoadipic semialdehyde synthase, mitochondrial;Lysine ketoglutarate reductase;Saccharopine dehydrogenase | -0.80       | -0.96, ns    |
| P55096 | Abcd3       | ATP-binding cassette sub-family D member 3                                                                       | -1.29       | -1.19, ns    |
| Q7TMS5 | Abcg2       | ATP-binding cassette sub-family G member 2                                                                       | -1.40       | -1.27,ns     |
| Q8R2Y0 | Abhd6       | Monoacylglycerol lipase ABHD6                                                                                    | -1.28, ns   | -1.22        |
| Q80XL6 | Acad11      | Acyl-CoA dehydrogenase family member 11                                                                          | -1.23       | -1.41        |
| P51174 | Acadl       | Long-chain specific acyl-CoA dehydrogenase, mitochondrial                                                        | -1.11, ns   | -1.24        |
| P45952 | Acadm       | Medium-chain specific acyl-CoA dehydrogenase, mitochondrial                                                      | -1.08, ns   | -1.25        |
| Q8QZT1 | Acat1       | Acetyl-CoA acetyltransferase, mitochondrial                                                                      | -1.21       | -1.19, ns    |
| Q9QYR9 | Acot2       | Acyl-coenzyme A thioesterase 2, mitochondrial                                                                    | -1.61       | -4.18        |
| Q8BWN8 | Acot4       | Acyl-coenzyme A thioesterase 4                                                                                   | -1.78, ns   | -1.95        |
| P41216 | Acs11       | Long-chain-fatty-acid--CoA ligase 1                                                                              | -1.13, ns   | -1.24        |
| Q14    |             |                                                                                                                  |             |              |

|        |          |                                                               |           |           |
|--------|----------|---------------------------------------------------------------|-----------|-----------|
| Q9R1Z7 | Pts      | 6-pyruvoyl tetrahydrobiopterin synthase                       | 1.21      | 1.32      |
| Q9QZD8 | Slc25a10 | Mitochondrial dicarboxylate carrier                           | -1.28     | -1.37     |
| Q8BH59 | Slc25a12 | Calcium-binding mitochondrial carrier protein Aralar1         | -0.81,ns  | -0.89     |
| Q9Z2Z6 | Slc25a20 | Mitochondrial carnitine/acylcarnitine carrier protein         | -1.01, ns | -1.33     |
| Q9CQ85 | Timm22   | Mitochondrial import inner membrane translocase subunit Tim22 | -1.26     | -1.19, ns |
| Q9CYG7 | Tomm34   | Mitochondrial import receptor subunit TOM34                   | -1.02, ns | -1.24     |
| P17717 | Ugt2b17  | UDP-glucuronosyltransferase 2B17                              | -1.28     | -1.24,ns  |

**Supplementary Table. 3. List of mitochondrial genes that are less expressed in Epac1/2<sup>-/-</sup> mice.** PrePH (WTprePH vs. Epac1/2<sup>-/-</sup>prePH), postPH (WTpostPH vs. Epac1/2<sup>-/-</sup>postPH), negative value: decreased protein expression in Epac1/2<sup>-/-</sup> mice relative to wt mice. ns: not significant. FC: fold change. Please see the Supplementary M&M section for details regarding statistical analysis.

## References

- 1 Cardiff, R. D., Miller, C. H. & Munn, R. J. Manual hematoxylin and eosin staining of mouse tissue sections. *Cold Spring Harbor protocols* **2014**, 655-658, doi:10.1101/pdb.prot073411 (2014).
- 2 Mehlem, A., Hagberg, C. E., Muhl, L., Eriksson, U. & Falkevall, A. Imaging of neutral lipids by oil red O for analyzing the metabolic status in health and disease. *Nature protocols* **8**, 1149-1154, doi:10.1038/nprot.2013.055 (2013).
- 3 Bligh, E. G. & Dyer, W. J. A rapid method of total lipid extraction and purification. *Canadian journal of biochemistry and physiology* **37**, 911-917, doi:10.1139/o59-099 (1959).
- 4 Greenhalgh, S. N. *et al.* Loss of Integrin alphavbeta8 in Murine Hepatocytes Accelerates Liver Regeneration. *Am J Pathol* **189**, 258-271, doi:10.1016/j.ajpath.2018.10.007 (2019).
- 5 Wisniewski, J. R., Zougman, A., Nagaraj, N. & Mann, M. Universal sample preparation method for proteome analysis. *Nature methods* **6**, 359-362, doi:10.1038/nmeth.1322 (2009).
- 6 Hernandez-Valladares, M. *et al.* Reliable FASP-based procedures for optimal quantitative proteomic and phosphoproteomic analysis on samples from acute myeloid leukemia patients. *Biological procedures online* **18**, 13, doi:10.1186/s12575-016-0043-0 (2016).
- 7 Cox, J. *et al.* Andromeda: a peptide search engine integrated into the MaxQuant environment. *Journal of proteome research* **10**, 1794-1805, doi:10.1021/pr101065j (2011).
- 8 Aasebo, E. *et al.* Freezing effects on the acute myeloid leukemia cell proteome and phosphoproteome revealed using optimal quantitative workflows. *Journal of proteomics* **145**, 214-225, doi:10.1016/j.jprot.201

749 *Author contributions:* KSA, LP: Planning and execution of experiments, preparation of  
750 manuscript; RA, HM, EA, IKNP, LH, RD, SJ, RKB, NH, FS: Planning and execution of  
751 experiments; SOD: Planning and financing study, preparing manuscript; MB: Coordinating,  
752 planning and financing study, preparing manuscript. All authors read and approved the final  
753 manuscript.  
754  
755 Competing interests: The authors declare no competing interests.
